# Supplementary material for: Variability in Leaf Color Induced by Chlorophyll Deficiency: Transcriptional Changes in Bamboo Leaves
Source: MDPI journal article supplement (doi:10.3390/cimb46020097), 2024-02-14
Supplement: s1 [file s1]

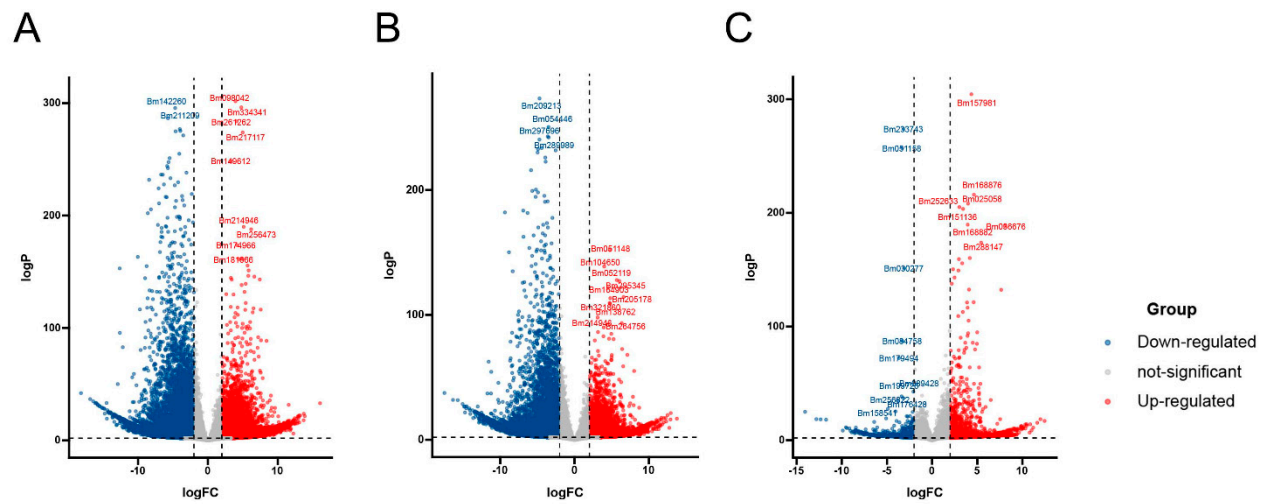

**Figure S1.** (A–C) Benchmarking Universal Single-Copy Orthologs (BUSCO) assessment results of transcriptome assembly.

## BUSCO Assessment Results

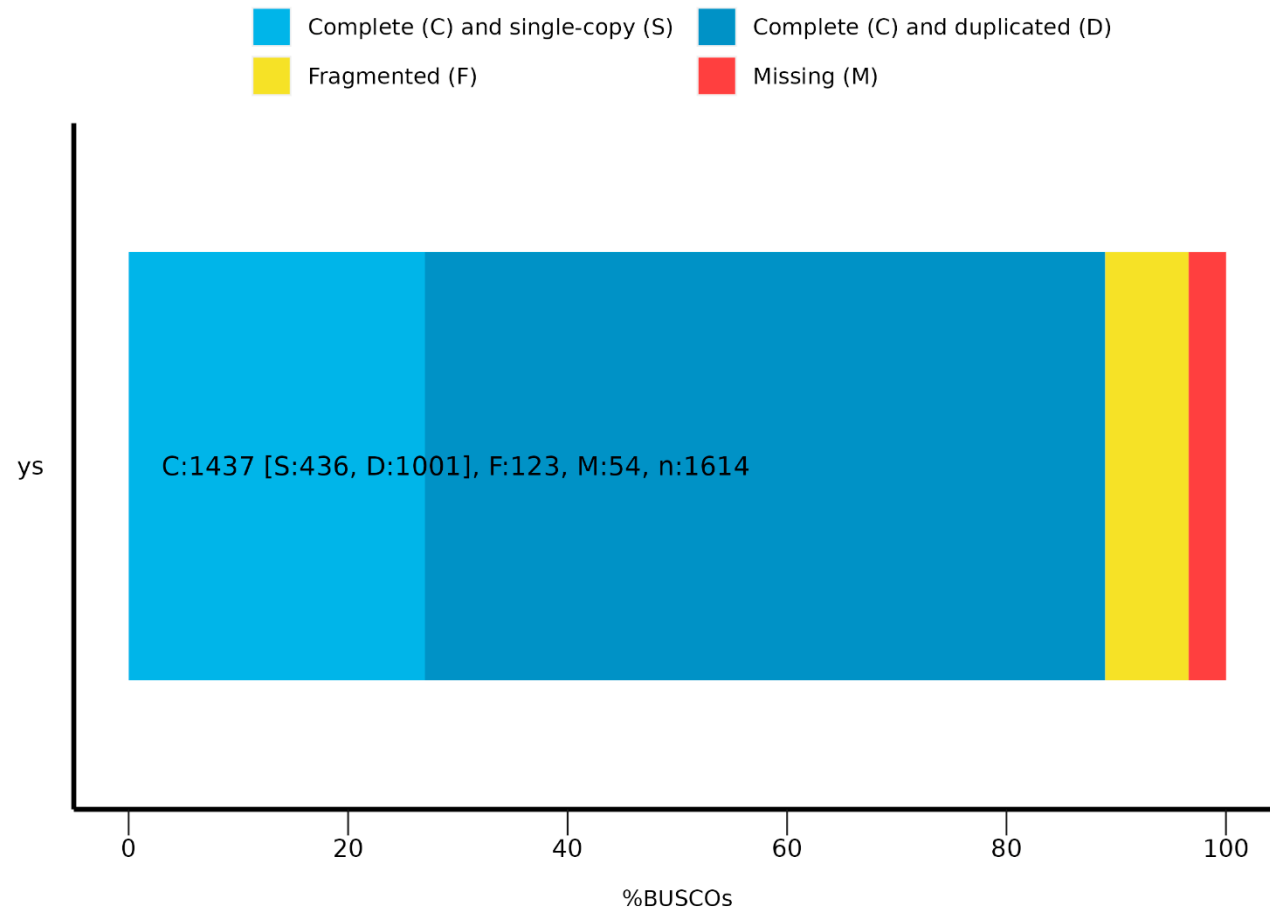

**Figure S2.** Differentially expressed genes (DEGs) among different color types.
