# Supplementary material for: Variability in Leaf Color Induced by Chlorophyll Deficiency: Transcriptional Changes in Bamboo Leaves
Source: Curr Issues Mol Biol. 2024 Feb 14;46(2):1503–15. doi: 10.3390/cimb46020097 (PMC10888276; doi:10.3390/cimb46020097)
Supplement: Supplementary file 1 [file cimb-46-00097-s001.zip]

Archive with 13 entries (13 files):
- File S1.pdf
- Supplementary Figures S1 and S2.pdf
- Table S1.tsv
- Table S10.xlsx
- Table S11.xlsx
- Table S2.xlsx
- Table S3.tsv
- Table S4.tsv
- Table S5.xlsx
- Table S6.tsv
- Table S7.tsv
- Table S8.tsv
- Table S9.tsv
