# Supplementary material for: Variability in Leaf Color Induced by Chlorophyll Deficiency: Transcriptional Changes in Bamboo Leaves
Source: Curr Issues Mol Biol. 2024 Feb 14;46(2):1503–15. doi: 10.3390/cimb46020097 (PMC10888276; doi:10.3390/cimb46020097)
Supplement: Supplementary file 1 [file cimb-46-00097-s001.zip › Table S2.xlsx]

## Sheet: Table S2
Unigene Length Information
Unigene length interval	Number of Unigenes
200-500bp	100951
500-1kbp	111452
1k-2kbp	77117
>2kbp	47359
Total	336879
Transcriptome Assembly Summary
Sequence Characteristic	Value
min length	201
mean length	1090
median length	740
max length	14962
N50	1586
N90	502
total nucleotides	367063318
