# Supplementary material for: Variability in Leaf Color Induced by Chlorophyll Deficiency: Transcriptional Changes in Bamboo Leaves
Source: Curr Issues Mol Biol. 2024 Feb 14;46(2):1503–15. doi: 10.3390/cimb46020097 (PMC10888276; doi:10.3390/cimb46020097)
Supplement: Supplementary file 1 [file cimb-46-00097-s001.zip › Table S5.xlsx]

## Sheet: keygene.FC
Differential gene expression analysis results for three leaf color types.
	G vs. GW					GW vs. W
gene	baseMean	log2FoldChange	log2 Fold Change Standard Error	P-value	Adjusted P-value	baseMean	log2FoldChange	log2 Fold Change Standard Error	P-value	Adjusted P-value
Bm299390	460.327	2.63069	0.300322	2.72878e-19	1.76237e-17	82.3953	1.03426	0.3165	0.000121158	0.0027998
Bm153304	107.255	2.45358	0.46012	1.39117e-08	2.49042e-07	17.1839	1.86346	0.677677	0.000318928	0.00597401
Bm047254	4090.58	2.66315	0.373755	1.66025e-13	6.2008e-12	705.949	1.16418	0.138093	4.04029e-18	1.02865e-15
Bm258849	14972.6	2.72694	0.525677	3.06958e-08	5.14923e-07	1730.78	4.62554	0.377895	1.09357e-35	8.27014e-33
Bm051745	810.784	1.08357	0.330828	0.000532278	0.00321773	333.407	1.04084	0.294919	4.74052e-05	0.00132171
Bm288262	405.258	1.49104	0.195307	7.83696e-15	3.40233e-13	131.044	1.34186	0.33576	5.41355e-06	0.000210948
Bm172075	1003.07	1.84576	0.238179	2.26276e-15	1.03967e-13	256.298	1.67	0.241223	3.38113e-13	5.23814e-11
Bm180904	950.36	2.07998	0.48315	3.06094e-06	3.39142e-05	196.858	1.72024	0.319618	5.23903e-09	4.1787e-07
Bm036587	709.261	3.04005	0.256432	2.3914e-33	3.57757e-31	100.554	1.0618	0.227171	3.68049e-07	1.95096e-05
Bm095358	4013.85	4.22414	0.37862	5.21535e-30	6.6499e-28	254.484	1.1407	0.33851	7.276e-05	0.00187065
Bm233526	275.113	2.73082	0.554438	9.86312e-08	1.49672e-06	31.8825	3.67975	0.732742	3.51747e-08	2.37508e-06
Bm151134	1120.65	1.77668	0.360116	2.03282e-07	2.90423e-06	316.575	1.17968	0.222362	1.20599e-08	9.08e-07
Bm115471	102.611	2.55808	0.385878	4.96081e-12	1.53556e-10	14.2812	2.99178	0.737012	4.1333e-06	0.000165679
Bm265165	1180.83	2.05998	0.36858	4.58052e-09	8.93963e-08	259.234	1.48362	0.537537	0.000345123	0.00634979
Bm336006	1795.55	3.94139	0.293625	3.94495e-42	8.74482e-40	108.061	3.28341	0.41286	1.02677e-16	2.26408e-14
Bm336003	262.275	2.61806	0.471445	3.68068e-09	7.28544e-08	42.4245	1.27321	0.438732	0.000288197	0.00553275
Bm235747	362.311	2.22519	0.473969	4.26027e-07	5.7058e-06	63.3946	2.46779	0.355659	2.77764e-13	4.36278e-11
Bm307049	998.899	1.48272	0.430351	0.000181096	0.00126525	324.814	1.12538	0.260051	1.63588e-06	7.34449e-05
Bm124826	2426.07	2.2933	0.303106	6.58815e-15	2.88278e-13	401.563	3.32099	0.363638	3.81146e-21	1.23926e-18
Bm056146	1755.02	2.04028	0.401216	7.51398e-08	1.16899e-06	405.23	1.45003	0.175113	1.07552e-17	2.63953e-15
Bm257582	7002.44	2.20628	0.162545	9.72594e-43	2.22678e-40	1465.85	1.76233	0.149816	4.76415e-33	3.19994e-30
Bm210497	479.299	4.42675	0.321088	2.63486e-44	6.44836e-42	23.4369	1.85333	0.572508	6.97993e-05	0.00180819
Bm118118	298.055	2.89918	0.323677	4.09522e-20	2.80976e-18	38.7799	1.84127	0.503245	1.56923e-05	0.00052465
Bm270597	2660.55	3.13	0.495413	2.73621e-11	7.64592e-10	233.134	12.4509	3.14887	1.05274e-17	2.58983e-15
Bm084624	1152.57	2.87832	0.774386	1.9818e-05	0.000179822	123.33	2.46965	0.328785	3.60078e-15	6.72063e-13
Bm143115	229.834	1.48551	0.408872	8.91527e-05	0.000677397	75.7433	1.00908	0.346864	0.000399881	0.00709004
Bm108304	132.949	1.19041	0.247962	7.3858e-07	9.38936e-06	52.6468	1.02065	0.348425	0.000371148	0.0067101
Bm130297	392.035	2.41002	0.45762	2.01718e-08	3.50246e-07	55.7441	4.20827	0.535277	3.74155e-16	7.74827e-14
Bm013041	2176.53	2.17201	0.294322	2.93118e-14	1.19352e-12	484.195	1.39165	0.160209	3.47949e-19	9.47294e-17
Bm332942	4010.09	3.69463	0.390189	2.49538e-22	1.97572e-20	291.404	2.65384	0.342373	5.37053e-16	1.09223e-13
Bm030869	2060.79	3.22941	0.80616	5.31107e-06	5.55669e-05	208.844	1.32467	0.194714	9.63625e-13	1.42374e-10
Bm021919	1931.14	2.294	0.492556	5.1984e-07	6.8305e-06	381.774	1.32818	0.241021	3.31213e-09	2.75365e-07
Bm016562	123.973	1.10012	0.238027	1.9634e-06	2.27083e-05	50.9573	1.0563	0.335755	0.000178366	0.00382084
Bm101735	6199.93	1.59772	0.201915	6.62209e-16	3.22117e-14	1977.12	1.21945	0.167684	3.85134e-14	6.61951e-12
Bm278031	195.763	2.30274	0.855005	0.000852999	0.00481447	23.8009	8.45282	2.91674	2.08686e-07	1.17128e-05
Bm107021	690.602	1.7041	0.632758	0.00157588	0.00810306	132.824	4.89077	0.542182	1.06513e-20	3.3255e-18
Bm028998	944.552	1.71243	0.400611	4.67131e-06	4.95205e-05	273.029	1.13566	0.266137	2.1302e-06	9.26631e-05
Bm013038	457.039	2.0362	0.526484	2.00935e-05	0.000182025	96.3619	1.6771	0.346864	9.48171e-08	5.78616e-06
Bm162297	1838.97	2.56896	0.821202	0.000195081	0.00135033	269.819	1.30678	0.330213	6.50807e-06	0.000246727
Bm047261	3978.91	3.59726	0.506406	1.0854e-13	4.12918e-12	276.434	3.85449	0.501158	7.25435e-16	1.44937e-13
Bm048901	6412.46	2.30585	0.224905	2.02039e-25	1.93701e-23	1338.95	1.40237	0.115365	5.02821e-35	3.69317e-32
Bm241968	1298.54	1.66373	0.198859	1.74777e-17	9.775e-16	412.174	1.04157	0.221879	3.33249e-07	1.78691e-05
Bm019102	1047.92	3.11874	0.638333	9.93695e-08	1.50719e-06	102.683	2.35822	0.559778	1.2649e-06	5.8753e-05
Bm007590	275.157	2.66956	0.572959	3.7957e-07	5.1414e-06	39.9824	1.56232	0.423363	1.60558e-05	0.000534463
Bm123103	91.8457	1.36162	0.479424	0.0015685	0.0080692	21.8327	8.5129	2.72949	8.61822e-10	8.07219e-08
Bm043200	833.157	3.33048	0.409315	4.15028e-17	2.24642e-15	94.9771	1.09907	0.222122	9.00878e-08	5.51735e-06
Bm112897	18839.6	1.7277	0.495993	0.000140675	0.00101285	5190.64	1.2907	0.190949	1.37294e-12	1.9854e-10
Bm195605	265.682	1.73235	0.190896	3.16404e-20	2.18842e-18	76.2862	1.33092	0.288635	3.69268e-07	1.9554e-05
Bm286893	50.6961	2.05938	0.658859	0.000296154	0.00193851	7.76167	6.04737	2.98507	0.000262417	0.00515296
Bm193420	330.537	2.48869	0.654546	1.81533e-05	0.000166388	52.1566	1.51459	0.424548	2.51983e-05	0.00078147
Bm064184	439.966	1.03927	0.287544	0.000161551	0.00114291	186.149	1.10007	0.245399	8.314e-07	4.02089e-05
Bm274443	828.092	1.1535	0.283106	2.20602e-05	0.000197729	318.029	1.30846	0.255063	2.69228e-08	1.87238e-06
Bm260691	400.62	2.26957	0.413274	6.51953e-09	1.23587e-07	87.4047	1.01844	0.238753	2.55967e-06	0.000109022
Bm066376	94.9917	2.41936	0.929148	0.000980226	0.00541976	10.3773	7.07059	2.67982	1.52496e-06	6.91339e-05
Bm081531	1344.95	4.49136	0.293037	4.13354e-54	1.48459e-51	73.5721	1.08266	0.308971	5.01527e-05	0.001382
Bm156450	1524.36	2.79503	0.452297	8.018e-11	2.08567e-09	220.293	1.45603	0.319241	4.07397e-07	2.13296e-05
Bm155121	372.91	2.18218	0.329184	6.14966e-12	1.87457e-10	71.5208	2.24831	0.282446	1.34796e-16	2.9343e-14
Bm080685	614.667	1.79148	0.426793	6.34761e-06	6.52509e-05	175.295	1.01693	0.190636	1.29153e-08	9.65992e-07
Bm124876	335.257	1.80044	0.647823	0.00110807	0.00600903	83.5348	1.1887	0.286648	3.39569e-06	0.000139847
Bm202394	1095.88	4.13165	0.247354	1.11634e-63	5.58763e-61	58.9013	3.20876	0.467829	4.26776e-13	6.57852e-11
Bm253980	106.928	2.13063	0.406483	2.93403e-08	4.94211e-07	20.0995	2.26495	0.622593	1.68942e-05	0.000558005
Bm155118	141.396	2.34994	0.791045	0.00036425	0.0023153	20.4047	2.20619	0.580174	9.01087e-06	0.000325533
Bm052119	1187.84	5.6759	0.236253	1.27667e-128	3.43241e-125	26.0283	1.61703	0.603438	0.000427568	0.00745935
Bm202397	3199.03	3.34872	0.376804	6.79481e-20	4.57196e-18	311.571	2.02993	0.265925	1.50591e-15	2.90083e-13
Bm293123	803.704	2.21092	0.247195	6.92651e-20	4.6589e-18	165.968	1.72464	0.233516	1.18449e-14	2.11045e-12
Bm073908	645.34	1.21914	0.378373	0.000544498	0.00328169	252.759	1.00546	0.139459	8.09299e-14	1.34349e-11
Bm242833	292.988	1.0584	0.180625	2.53422e-09	5.15552e-08	88.0357	5.62708	0.513782	3.95704e-28	2.05071e-25
Bm176040	303.006	3.3118	0.541494	9.11399e-11	2.35416e-09	32.6794	1.13691	0.366758	0.000191206	0.00401118
Bm263761	71.0157	2.29396	0.66557	7.96764e-05	0.0006145	9.5505	6.61977	2.88464	5.36765e-05	0.00146369
Bm160955	11101.9	3.54811	0.62395	1.14523e-09	2.46772e-08	840.137	2.44027	0.478783	1.94932e-08	1.40945e-06
Bm004053	2681.87	2.68355	0.263151	3.071e-25	2.9014e-23	413.341	1.84777	0.181366	1.62081e-25	7.04147e-23
Bm231769	1389.65	2.54982	0.34579	2.49373e-14	1.02292e-12	256.761	1.12863	0.240745	3.0169e-07	1.63572e-05
Bm086345	850.918	1.37376	0.351521	3.2147e-05	0.000275528	243.137	2.4996	0.392493	1.09862e-11	1.38131e-09
Bm149310	935.687	3.27217	0.306015	1.18173e-27	1.30978e-25	113.538	1.08581	0.231242	3.14912e-07	1.70019e-05
Bm278867	769.285	4.00959	0.565181	1.03115e-13	3.93664e-12	53.3271	1.1265	0.359273	0.000167132	0.00362276
Bm270905	11373.4	2.09473	0.217887	6.4093e-23	5.27888e-21	2490.3	1.78852	0.131833	6.33705e-43	6.81026e-40
Bm020182	522.242	2.0648	0.32267	3.10681e-11	8.60611e-10	124.538	1.26188	0.250633	4.71992e-08	3.07908e-06
Bm313245	4939.06	3.10588	0.323957	1.10848e-22	8.99202e-21	602.278	1.60783	0.230235	2.28151e-13	3.60571e-11
Bm035650	253.192	2.22265	0.433796	4.94103e-08	7.95124e-07	50.101	1.42942	0.530053	0.000446532	0.00770332
Bm315899	1067.83	2.3518	0.47031	8.97257e-08	1.37354e-06	185.248	1.8277	0.511797	1.97372e-05	0.000637875
Bm280727	331.372	3.94689	0.516876	1.86665e-15	8.67199e-14	18.9321	2.94511	0.889317	4.59897e-05	0.00128814
Bm139546	116.868	1.94124	0.262102	2.98872e-14	1.21563e-12	26.6968	1.87988	0.48881	7.99868e-06	0.000293536
Bm182371	351.711	2.53612	0.303643	9.86807e-18	5.64315e-16	66.4697	1.04931	0.286746	2.96659e-05	0.000892899
Bm327874	134.096	1.24095	0.371812	0.000353899	0.00225966	44.5982	1.57946	0.553021	0.000255224	0.00504294
Bm323037	2001.45	1.9588	0.501018	1.90988e-05	0.000174003	464.936	1.49768	0.176959	2.24195e-18	5.83901e-16
Bm064110	571.946	3.14024	0.505344	5.4259e-11	1.44373e-09	59.0567	2.24335	0.413234	3.57232e-09	2.95314e-07
Bm118618	30357.5	3.97477	0.429218	2.1554e-21	1.60524e-19	2110.85	1.51862	0.326141	2.35455e-07	1.31072e-05
Bm193003	512.4	2.3432	0.581464	8.12613e-06	8.13516e-05	93.8347	1.38961	0.291525	1.6e-07	9.28025e-06
Bm127500	182.386	2.59767	0.274137	3.87594e-22	3.02927e-20	29.5777	1.58029	0.534762	0.000195291	0.00408028
Bm311039	231.67	2.49961	0.56587	1.33092e-06	1.60111e-05	35.799	1.73376	0.583537	0.00016229	0.00353883
Bm265560	316.535	3.61715	0.457163	2.34392e-16	1.18295e-14	20.6557	8.36327	2.76281	8.49727e-09	6.57958e-07
Bm300395	681.44	2.20946	0.316565	5.32225e-13	1.86988e-11	124.642	2.50656	0.494718	2.1452e-08	1.53369e-06
Bm290935	202.679	1.69383	0.216023	1.28683e-15	6.06361e-14	60.2681	1.15041	0.390961	0.000295565	0.0056466
Bm043245	675.218	1.68988	0.48405	0.000123378	0.000902049	193.992	1.12912	0.234958	1.72981e-07	9.93268e-06
Bm300396	1625.64	2.46166	0.440534	3.55168e-09	7.05013e-08	252.52	2.43358	0.415259	2.54854e-10	2.58126e-08
Bm092601	6816.99	2.31994	0.431617	1.32703e-08	2.38467e-07	1174.74	2.34851	0.151422	2.09534e-55	3.19287e-52
Bm334341	2650.3	2.9085	0.172221	7.52934e-65	3.98038e-62	359.117	1.88403	0.18218	3.43261e-26	1.58574e-23
Bm106609	1193.97	1.81652	0.374653	2.98739e-07	4.13065e-06	340.148	1.05962	0.111186	2.15708e-22	7.86516e-20
Bm278843	3430.87	3.28525	0.425498	1.24895e-15	5.88954e-14	396.855	1.16237	0.210691	3.79237e-09	3.11738e-07
Bm315851	311.088	2.32144	0.445841	3.02389e-08	5.07937e-07	58.818	1.40958	0.46874	0.000180449	0.00385172
Bm191274	93.4015	1.29235	0.283508	2.15425e-06	2.4697e-05	31.9284	1.44725	0.441734	7.85729e-05	0.00198757
Bm309161	269.688	2.38163	0.500791	2.83426e-07	3.93512e-06	46.4412	1.77622	0.333821	7.86044e-09	6.13066e-07
Bm209313	594.999	2.70509	0.515419	1.89456e-08	3.30602e-07	87.9154	1.53721	0.326322	1.90253e-07	1.08391e-05
Bm219599	1648.71	1.89691	0.476583	1.48454e-05	0.000139386	320.715	3.5684	0.444192	4.91306e-17	1.12213e-14
Bm057191	352.085	3.83453	0.83515	3.1357e-07	4.31891e-06	17.4112	7.94922	2.82129	3.48669e-07	1.85893e-05
Bm332195	260.17	1.3479	0.266577	1.67518e-07	2.43525e-06	89.1908	1.28756	0.42406	0.000186882	0.00395022
Bm326967	1834.59	1.7927	0.279866	3.82843e-11	1.04573e-09	523.004	1.21072	0.154699	5.47015e-16	1.10588e-13
Bm029928	726.673	3.03254	0.287378	5.87548e-27	6.21213e-25	89.4021	1.8565	0.300826	4.83781e-11	5.43956e-09
Bm047358	1193.27	1.85897	0.33746	8.44502e-09	1.5674e-07	311.385	1.37929	0.240834	9.0746e-10	8.46085e-08
Bm129106	308.032	1.9898	0.421023	4.61812e-07	6.13442e-06	74.0745	1.28958	0.258261	5.90347e-08	3.77164e-06
Bm013115	1165.91	1.17727	0.318672	0.000101472	0.000759381	417.792	1.63095	0.209371	5.39244e-16	1.0945e-13
Bm144724	297.832	2.87077	0.28582	1.25618e-24	1.14264e-22	45.206	1.13696	0.329988	5.81427e-05	0.00155434
Bm082153	755.931	1.20784	0.142758	1.27512e-17	7.21953e-16	284.575	1.35628	0.292834	3.12873e-07	1.69276e-05
Bm150164	150.828	2.09892	0.584819	5.52016e-05	0.000445111	23.1735	8.44942	2.87918	1.00292e-07	6.08754e-06
Bm001140	6378.2	1.70689	0.294816	1.5996e-09	3.36738e-08	1939.96	1.09509	0.127972	1.46511e-18	3.84523e-16
Bm049518	1200.64	2.37554	0.383621	9.16085e-11	2.36497e-09	205.898	2.18446	0.197651	1.41236e-29	7.83659e-27
Bm002425	1867.72	1.07059	0.292717	0.000132283	0.000959845	766.811	1.12393	0.307586	2.63165e-05	0.00081024
Bm075885	309.748	3.22829	0.481849	2.13492e-12	6.9286e-11	28.6806	2.74065	0.69125	3.94551e-06	0.000159152
Bm184360	314.27	2.25954	0.265496	3.15679e-18	1.88725e-16	57.1427	2.42037	0.40457	1.42614e-10	1.51038e-08
Bm005927	3230.87	4.63336	0.719967	8.27018e-12	2.48355e-10	115.68	2.4941	0.757742	4.15815e-05	0.00118549
Bm222793	2688.06	1.75187	0.392011	1.97861e-06	2.28659e-05	773.541	1.13216	0.167986	1.86402e-12	2.62853e-10
Bm045141	974.622	3.56556	0.250507	5.70297e-47	1.56914e-44	82.9132	2.18364	0.296322	1.19708e-14	2.12917e-12
Bm064764	2432.59	3.49497	0.322815	2.36968e-28	2.75461e-26	223.139	1.83019	0.284453	8.83997e-12	1.1338e-09
Bm117592	411.207	2.47743	0.32702	5.42807e-15	2.39241e-13	63.3667	2.6284	0.512296	1.66975e-08	1.22202e-06
Bm297062	121.273	2.28604	0.296517	2.24762e-15	1.03297e-13	23.1621	1.58541	0.592413	0.000449399	0.00774101
Bm096355	905.592	2.70065	0.32492	1.27972e-17	7.24117e-16	140.724	1.61884	0.225576	5.99503e-14	1.00999e-11
Bm277472	716.684	1.12556	0.360974	0.000832168	0.00471159	283.812	1.06924	0.317588	8.10859e-05	0.00204102
Bm142502	644.823	2.70579	0.501823	8.71569e-09	1.61429e-07	90.6214	1.87253	0.36393	1.83098e-08	1.33142e-06
Bm324719	286.699	2.03922	0.518059	1.51237e-05	0.000141676	65.6107	1.13877	0.400977	0.000402329	0.00712372
Bm329171	335.65	1.92991	0.241937	3.45569e-16	1.7178e-14	90.1039	1.03179	0.362376	0.000461841	0.00790597
Bm167440	833.082	3.41736	0.926607	1.6511e-05	0.000152974	65.9648	1.63984	0.420305	6.33888e-06	0.00024092
Bm020713	658.836	2.87248	0.346575	1.42878e-17	8.04833e-16	97.1234	1.16379	0.413983	0.000421753	0.00737681
Bm091034	243.636	1.91917	0.444039	3.14672e-06	3.47725e-05	49.7311	2.73427	0.404996	1.04996e-12	1.53795e-10
Bm040328	77.9237	1.07527	0.280981	6.75145e-05	0.000531172	23.1001	4.76817	0.896389	1.89071e-08	1.37095e-06
Bm189681	370.672	3.29263	0.391107	3.93748e-18	2.33837e-16	35.987	2.18428	0.457887	1.21131e-07	7.23627e-06
Bm167415	365.722	1.82256	0.281364	2.2796e-11	6.43109e-10	81.1338	2.82248	0.502787	1.12053e-09	1.026e-07
Bm167416	622.844	1.85656	0.135248	1.73753e-43	4.08752e-41	159.382	1.64706	0.337855	7.70677e-08	4.78307e-06
Bm030529	281.537	1.76903	0.431226	9.82842e-06	9.64333e-05	70.6912	1.46803	0.564585	0.000547379	0.00898722
Bm074945	211.229	2.83892	0.765508	2.05563e-05	0.000185797	24.099	1.82307	0.662783	0.000304618	0.00576881
Bm050591	549.709	2.04821	0.403462	7.6212e-08	1.1842e-06	129.941	1.25329	0.245201	3.2112e-08	2.19882e-06
Bm117136	2471.48	3.18309	0.517303	8.05285e-11	2.09415e-09	274.349	1.59967	0.195813	2.58941e-17	6.09132e-15
Bm123407	2033.03	4.44902	0.54082	1.44393e-17	8.12394e-16	108.523	1.11284	0.269193	3.94007e-06	0.000158995
Bm293536	394.345	1.59442	0.523642	0.000634962	0.00374125	101.289	1.99127	0.338394	2.6534e-10	2.67949e-08
Bm141245	598.803	1.31636	0.382113	0.000220167	0.00150035	186.93	1.87981	0.434294	8.93608e-07	4.29125e-05
Bm083431	739.646	1.79479	0.28246	5.31916e-11	1.41753e-09	210.509	1.14566	0.268266	2.04796e-06	8.95053e-05
Bm217805	181.386	1.47304	0.484975	0.000735793	0.00424328	40.8042	9.52176	2.8988	1.94674e-10	2.00555e-08
Bm080392	650.954	3.02224	0.819088	2.01221e-05	0.000182249	71.6914	1.44975	0.298633	9.96236e-08	6.05415e-06
Bm111416	204.879	1.75901	0.310262	3.70912e-09	7.33699e-08	60.4753	1.01053	0.281868	4.18388e-05	0.00119083
Bm273934	13545.7	4.6721	0.454093	6.26014e-26	6.24352e-24	558.54	1.92871	0.306648	2.12143e-11	2.56314e-09
Bm120315	62.4751	1.87764	0.537897	9.99105e-05	0.000749424	11.0952	7.21444	2.67541	7.37759e-07	3.62119e-05
Bm306011	4144.21	3.20504	0.332529	6.57772e-23	5.41522e-21	466.963	1.70853	0.225463	2.68485e-15	5.09492e-13
Bm130126	1001.25	5.03358	0.777832	6.11156e-12	1.86356e-10	24.8425	3.95144	1.21426	4.74269e-05	0.00132171
Bm258346	155.31	1.88143	0.238618	7.83856e-16	3.77581e-14	39.3565	1.48599	0.405359	1.83096e-05	0.000598751
Bm164348	555.488	2.26593	0.249619	1.97382e-20	1.38196e-18	112.476	1.56718	0.36585	1.34165e-06	6.18955e-05
Bm029962	643.82	2.91843	0.472768	7.42389e-11	1.94024e-09	87.1229	1.40595	0.260332	6.06734e-09	4.82054e-07
Bm069140	1214.28	3.2408	0.587844	3.33947e-09	6.6605e-08	107.68	2.93623	0.503422	2.85018e-10	2.85561e-08
Bm249862	223.552	2.29103	0.568456	8.35021e-06	8.33466e-05	41.6835	1.35693	0.445831	0.00017144	0.00369809
Bm197256	4301.07	2.61097	0.346157	7.35603e-15	3.2024e-13	737.327	1.37783	0.144471	1.39495e-22	5.17877e-20
Bm098042	2286.07	2.88673	0.208971	2.07785e-44	5.09844e-42	362.716	1.02033	0.211088	1.72861e-07	9.93141e-06
Bm195504	219.757	1.14879	0.390442	0.00147953	0.00768934	74.9814	1.88246	0.276687	8.04531e-13	1.20614e-10
Bm212047	1207.59	2.81827	0.409942	7.95835e-13	2.73163e-11	144.815	3.11507	0.455859	4.59866e-13	7.06008e-11
Bm264959	828.223	4.13592	0.265851	1.262e-55	4.86695e-53	50.0144	1.92969	0.353174	3.25697e-09	2.71443e-07
Bm147896	940.618	2.21442	0.282077	7.59267e-16	3.67052e-14	212.327	1.19178	0.171934	4.67112e-13	7.16056e-11
Bm214243	372.704	2.19035	0.722028	0.000345142	0.0022123	70.4853	1.36521	0.255842	8.93056e-09	6.87599e-07
Bm042463	598.004	1.93124	0.611052	0.000297635	0.00194711	119.528	2.19826	0.512861	9.97214e-07	4.74367e-05
Bm183506	113.794	1.66389	0.457965	7.31009e-05	0.000569634	31.0994	1.37803	0.435381	0.000118733	0.00275435
Bm306436	727.532	3.16223	0.789058	5.39774e-06	5.63359e-05	67.8417	2.08942	0.367656	8.91735e-10	8.32183e-08
Bm306438	1428.88	1.24638	0.190125	2.48821e-11	6.98611e-10	557.771	1.09522	0.20307	8.28009e-09	6.43339e-07
Bm010887	397.24	3.5161	0.40163	1.92803e-19	1.2586e-17	39.7894	1.07468	0.353046	0.000245913	0.004894
Bm022837	865.018	1.88046	0.549469	0.000129433	0.000941342	202.796	1.51754	0.284335	7.57976e-09	5.92802e-07
Bm103402	600.232	3.29824	0.305969	4.50623e-28	5.13981e-26	67.2424	1.25806	0.422223	0.000231729	0.00466907
Bm261016	724.254	2.53508	0.30819	3.15885e-17	1.72617e-15	133.083	1.19	0.33136	3.05961e-05	0.000915498
Bm313184	1011.56	1.75204	0.310174	4.19745e-09	8.23901e-08	284.863	1.28883	0.25433	3.82691e-08	2.55697e-06
Bm266704	1006.89	1.74157	0.423004	1.01181e-05	9.90421e-05	286.38	1.14837	0.219714	1.90952e-08	1.38263e-06
Bm272557	1830.11	1.29086	0.238954	2.82649e-08	4.77935e-07	706.277	1.02361	0.180525	1.91056e-09	1.66289e-07
Bm178139	584.813	1.15797	0.217314	4.82115e-08	7.77761e-07	168.112	5.2471	0.445946	6.2435e-33	4.08605e-30
Bm091446	1198.96	1.85755	0.569651	0.000232407	0.00157221	261.433	2.08052	0.248311	3.63997e-18	9.31377e-16
Bm329993	204.711	3.04409	0.883246	4.78401e-05	0.000392034	15.9724	7.47493	3.05483	2.5601e-05	0.000791768
Bm156321	776.871	3.43687	0.398457	5.9125e-19	3.73774e-17	64.9395	2.88183	0.332424	3.41573e-19	9.37436e-17
Bm066047	259.535	1.58516	0.167505	9.63776e-22	7.35232e-20	83.7689	1.0939	0.339619	0.000131136	0.00298644
Bm262317	506.728	3.37239	0.622491	5.47908e-09	1.05317e-07	43.6534	2.21603	0.436962	2.50968e-08	1.76463e-06
Bm041565	5978.01	2.34476	0.334174	3.81951e-13	1.3705e-11	1148.2	1.53346	0.333465	3.18408e-07	1.71816e-05
Bm134571	1319.54	1.45284	0.469229	0.000655433	0.00384393	436.229	1.09748	0.193117	1.59922e-09	1.40994e-07
Bm155016	888.074	3.11211	0.273396	5.89794e-31	7.88342e-29	105.561	1.71733	0.382975	4.94625e-07	2.52617e-05
Bm199942	74.3592	2.04349	0.633007	0.000211803	0.00145055	13.9332	1.88795	0.74343	0.000579101	0.00939923
Bm285027	681.257	2.04493	0.510976	1.14902e-05	0.000110855	134.469	2.04951	0.512064	3.39161e-06	0.000139791
Bm285029	2465.11	1.21392	0.290145	1.28783e-05	0.000122849	733.74	3.16292	0.368437	5.06289e-19	1.36383e-16
Bm265897	335.872	1.94778	0.585759	0.000165289	0.0011666	71.687	1.6843	0.434589	7.02117e-06	0.000262837
Bm180087	154.393	1.52513	0.488371	0.000522513	0.00316653	43.6072	1.60483	0.397966	3.95856e-06	0.000159552
Bm077986	1042.98	3.31263	0.370743	4.32728e-20	2.96249e-18	118.24	1.17881	0.300108	8.41638e-06	0.000306442
Bm023323	1172.91	1.93484	0.459821	5.35719e-06	5.59845e-05	267.407	1.68767	0.346806	7.8909e-08	4.88546e-06
Bm148348	428.993	1.76842	0.316697	5.99366e-09	1.14355e-07	123.152	1.16126	0.230766	5.29639e-08	3.42668e-06
Bm152841	132.632	2.50944	0.309268	7.47623e-17	3.95008e-15	19.5821	2.88568	0.681846	1.58945e-06	7.16123e-05
Bm281912	141.892	1.07472	0.232977	2.11456e-06	2.4276e-05	59.6886	1.04753	0.299656	5.4011e-05	0.00147159
Bm315318	67.717	2.20007	0.576902	2.17539e-05	0.0001953	11.0999	2.59549	0.882261	0.000185204	0.00392204
Bm219983	680.252	2.81903	0.474426	3.25732e-10	7.71197e-09	91.4063	1.80551	0.318601	1.02854e-09	9.50294e-08
Bm289875	395.811	2.40966	0.742914	0.00014467	0.001038	56.7575	2.15506	0.618385	2.47903e-05	0.000772807
Bm171142	158.63	1.39087	0.491455	0.00155188	0.00799426	51.4033	1.20234	0.36531	9.02478e-05	0.00222125
Bm229780	1573.6	3.00155	0.255515	8.6829e-33	1.26971e-30	223.115	1.21724	0.153723	2.75527e-16	5.84817e-14
Bm022456	757.287	2.18693	0.414945	2.26393e-08	3.89389e-07	132.79	2.86441	0.49757	4.56238e-10	4.44034e-08
Bm115403	2546.66	4.75402	0.828207	5.94302e-10	1.34804e-08	71.9749	6.40947	1.12026	1.16651e-09	1.06144e-07
Bm302460	14239.8	2.37354	0.592195	8.48789e-06	8.45953e-05	2031.53	3.59327	0.351337	8.92489e-26	4.014e-23
Bm289880	925.659	1.65104	0.249589	1.08488e-11	3.20122e-10	269.48	1.47791	0.271816	4.42844e-09	3.58254e-07
Bm076210	278.579	1.96931	0.393997	1.19719e-07	1.78888e-06	61.8109	1.69343	0.589417	0.000217297	0.00443872
Bm076211	1382.58	2.82981	0.357739	3.59308e-16	1.78374e-14	191.585	1.82506	0.243018	4.29885e-15	7.99429e-13
Bm134149	131.2	2.11422	0.764928	0.000829014	0.00469642	24.1315	1.45631	0.514189	0.000315107	0.00591915
Bm261093	198.225	2.4061	0.216626	2.05123e-29	2.54308e-27	33.1199	2.41551	0.537157	4.08424e-07	2.13615e-05
Bm123024	163.308	1.1244	0.244846	2.19685e-06	2.51395e-05	63.6042	1.22591	0.39886	0.000179335	0.0038347
Bm336630	81.5554	2.48997	0.328703	5.90425e-15	2.59317e-13	11.291	4.35173	1.2612	7.30725e-05	0.00187632
Bm295267	2077.85	3.08682	0.494059	4.45171e-11	1.20219e-09	256.805	1.35438	0.203331	2.54962e-12	3.54633e-10
Bm096293	2339.03	2.59785	0.321059	7.78381e-17	4.10452e-15	430.676	1.06135	0.187322	1.83982e-09	1.60955e-07
Bm005087	174.344	1.35533	0.214863	1.12092e-10	2.86237e-09	62.2962	1.15168	0.336118	6.03347e-05	0.00159995
Bm152834	110.957	2.55672	0.31493	7.33776e-17	3.88019e-15	16.8623	2.08245	0.696227	0.00015485	0.00340497
Bm217398	1077.03	2.82668	0.723173	9.62236e-06	9.46193e-05	136.482	1.59928	0.249133	1.08349e-11	1.36397e-09
Bm182214	1800.29	2.48393	0.358241	5.46656e-13	1.91833e-11	327.854	1.34814	0.298881	5.56467e-07	2.81387e-05
Bm146140	1452.51	1.537	0.363401	7.31916e-06	7.41446e-05	439.73	1.48761	0.208018	7.33487e-14	1.22161e-11
Bm021572	441.506	2.32858	0.364246	2.65164e-11	7.42502e-10	82.0935	1.72627	0.382039	4.27196e-07	2.22181e-05
Bm195511	594.469	1.06842	0.248066	8.66267e-06	8.61411e-05	242.945	1.20929	0.283419	1.94495e-06	8.53688e-05
Bm041717	1937.24	1.9813	0.468681	4.64479e-06	4.9267e-05	443.961	1.55206	0.167511	1.61107e-21	5.35767e-19
Bm200409	186.821	1.25894	0.359168	0.000188362	0.00130926	62.1265	1.62642	0.451567	2.09358e-05	0.00067088
Bm106773	1659.59	2.62945	0.290976	2.24581e-20	1.56657e-18	289.059	1.24698	0.240653	2.16773e-08	1.54656e-06
Bm325502	1688.73	2.38973	0.217236	5.1549e-29	6.23889e-27	337.764	1.33262	0.207028	1.15645e-11	1.44866e-09
Bm095581	1413.04	1.99014	0.540217	4.42801e-05	0.000366016	318.915	1.46163	0.194527	5.03619e-15	9.24756e-13
Bm324646	608.485	3.98766	0.49294	4.91195e-17	2.63895e-15	39.6802	1.53893	0.564941	0.000376323	0.00677488
Bm233779	4171.07	2.29311	0.434103	2.27812e-08	3.91614e-07	793.4	1.71751	0.154664	9.25128e-30	5.18956e-27
Bm130867	211.16	2.40426	0.4572	2.15058e-08	3.71523e-07	41.3457	1.00749	0.349803	0.000448154	0.00772478
Bm099979	1564.35	2.69588	0.187965	1.66143e-47	4.66687e-45	254.076	1.52485	0.195417	5.30107e-16	1.08025e-13
Bm001696	245.728	2.75961	0.54035	3.87275e-08	6.37662e-07	31.6818	2.11629	0.504247	1.66061e-06	7.43917e-05
Bm013213	746.26	1.71067	0.460282	5.05041e-05	0.000411767	212.58	1.17161	0.200024	5.25608e-10	5.03863e-08
Bm013210	185.216	2.95213	0.367942	1.26495e-16	6.56361e-15	23.0586	1.81535	0.533576	4.2498e-05	0.00120656
Bm165500	219.877	1.21355	0.413775	0.00141761	0.00740863	79.1154	1.21158	0.397751	0.000197759	0.0041179
Bm067924	265.469	2.62386	0.407017	1.53699e-11	4.42496e-10	44.0636	1.28369	0.35024	2.2308e-05	0.000707961
Bm329062	778.552	4.0507	0.821097	5.58486e-08	8.90205e-07	41.7845	1.79634	0.656303	0.000311573	0.00586462
Bm329061	1431.82	2.99739	0.369158	4.91979e-17	2.64241e-15	180.417	1.73748	0.247431	1.65204e-13	2.63537e-11
Bm026502	446.81	2.70165	0.379882	1.5011e-13	5.63771e-12	72.0751	1.27734	0.29836	1.72723e-06	7.70716e-05
Bm106397	7466.7	3.35558	0.404434	1.07183e-17	6.11079e-16	658.372	2.89976	0.130871	5.81396e-110	2.19841e-106
Bm262706	1057.25	2.35589	0.30813	3.39216e-15	1.52727e-13	224.339	1.08254	0.166657	1.04643e-11	1.32384e-09
Bm031990	1814.61	2.87167	0.341748	5.54682e-18	3.25407e-16	259.174	1.48491	0.248167	1.81861e-10	1.88115e-08
Bm190568	377.838	1.84214	0.560386	0.000213219	0.00145903	72.487	3.73331	0.648882	4.65612e-10	4.51436e-08
Bm156679	165.694	3.60867	0.311532	6.01206e-32	8.47538e-30	12.2031	3.09967	0.844907	1.94009e-05	0.000629598
Bm291297	526.186	3.26694	0.314132	2.65533e-26	2.70856e-24	57.8363	1.53948	0.384013	4.47372e-06	0.0001771
Bm084869	1643.34	1.64699	0.256606	4.02053e-11	1.09328e-09	483.352	1.46808	0.181955	6.15734e-17	1.38464e-14
Bm133550	10922.7	2.17469	0.317359	1.31099e-12	4.38314e-11	2171.04	2.0614	0.194843	2.55288e-27	1.24111e-24
Bm222262	306.14	1.77007	0.639053	0.0011647	0.00626612	79.4705	1.05469	0.317558	9.76043e-05	0.00236189
Bm307232	1593.4	1.94981	0.478236	9.43344e-06	9.29169e-05	319.219	2.64362	0.368736	4.4806e-14	7.64954e-12
Bm069224	114.144	2.01155	0.366542	8.30255e-09	1.54339e-07	24.4798	1.75461	0.652894	0.000381529	0.00685048
Bm025286	2606.05	2.15391	0.464978	6.65548e-07	8.53471e-06	436.401	3.75599	0.507002	6.79501e-15	1.23051e-12
Bm145534	410.574	2.09968	0.379376	5.66367e-09	1.08555e-07	98.1457	1.0003	0.345977	0.0004291	0.00747713
Bm189551	181.906	1.6047	0.513698	0.000477772	0.00292696	52.2836	1.21612	0.349009	4.55902e-05	0.00128135
Bm269308	220.806	1.46366	0.402808	9.13514e-05	0.000692147	51.4892	6.90234	1.14924	1.24318e-09	1.12419e-07
Bm057256	18039.4	3.25002	0.447891	3.66425e-14	1.47352e-12	1731.13	2.50209	0.22324	2.26655e-30	1.30735e-27
Bm013282	69.8926	1.32096	0.356858	8.33309e-05	0.000638394	23.729	1.27598	0.463078	0.000462263	0.00790988
Bm062616	122.596	2.22888	0.336448	6.27121e-12	1.90977e-10	24.6734	1.55323	0.455887	4.76276e-05	0.00132565
Bm179732	192.308	2.63383	0.372441	2.11036e-13	7.7876e-12	31.5156	1.28779	0.452511	0.000349375	0.00641253
Bm020828	843.537	2.38284	0.432053	5.60189e-09	1.07458e-07	151.499	1.60815	0.370871	1.0215e-06	4.84164e-05
Bm311713	6555.56	2.94073	0.266797	3.68934e-29	4.49405e-27	980.36	1.14993	0.125392	5.58828e-21	1.79848e-18
Bm062624	181.793	1.23939	0.410284	0.00103009	0.00565345	64.4047	1.29686	0.323935	5.64164e-06	0.000218091
Bm252933	225.637	1.07379	0.318589	0.000384134	0.00242247	90.127	1.26593	0.242097	1.74752e-08	1.27528e-06
Bm071584	231.145	1.37885	0.41175	0.000287927	0.00189176	76.3734	1.22231	0.431575	0.000368305	0.0066754
Bm317004	3941.82	3.15385	0.160413	5.67521e-87	5.42167e-84	423.985	2.54338	0.20753	9.22353e-36	7.13384e-33
Bm062631	396.868	4.02732	0.672497	1.35535e-10	3.41467e-09	20.2426	3.04274	0.86634	2.15969e-05	0.000688819
Bm111752	1758.44	2.72176	0.280248	3.62151e-23	3.02514e-21	240.839	2.58689	0.292207	5.04993e-20	1.50751e-17
Bm111751	222.976	1.98248	0.409653	2.64111e-07	3.68652e-06	46.434	2.17596	0.553516	4.48427e-06	0.000177448
Bm130494	840.912	2.57555	0.417956	9.85341e-11	2.53299e-09	149.127	1.04846	0.372745	0.000495988	0.00834361
Bm194531	118.265	1.55604	0.40644	3.8365e-05	0.000322563	30.1573	2.39581	0.626541	7.17583e-06	0.000267473
Bm081723	1904.86	2.4064	0.369021	1.16603e-11	3.42082e-10	338.265	1.77167	0.342665	1.57801e-08	1.15737e-06
Bm033644	1035.23	1.18444	0.265202	3.49438e-06	3.81708e-05	392.156	1.34948	0.177289	2.56205e-15	4.88003e-13
Bm217605	296.965	2.79014	0.708996	8.66113e-06	8.61369e-05	38.6222	1.40853	0.490926	0.000279466	0.00541282
Bm000749	1542	1.2813	0.343311	7.79825e-05	0.000603042	565.447	1.15207	0.261415	1.10216e-06	5.18303e-05
Bm330596	437.721	1.5436	0.397518	3.12266e-05	0.000268544	136.953	1.12363	0.355773	0.000152855	0.00336981
Bm092424	1091.62	2.33145	0.33359	4.23613e-13	1.51106e-11	179.066	2.9217	0.508827	4.97008e-10	4.78694e-08
Bm315242	987.833	2.17932	0.26142	1.47022e-17	8.26199e-16	219.125	1.38435	0.228873	1.31367e-10	1.39997e-08
Bm058514	98.9471	2.21235	0.297864	2.09701e-14	8.66992e-13	18.2787	2.25224	0.673882	4.79786e-05	0.00133397
Bm315230	321.627	3.66723	0.759278	1.05029e-07	1.58523e-06	22.7514	1.70454	0.615608	0.000317113	0.00594916
Bm181666	4156	2.62047	0.216619	1.56943e-34	2.47997e-32	675.262	1.79363	0.16853	1.44101e-27	7.10717e-25
Bm115736	2925.61	4.17552	0.357836	1.46441e-32	2.11351e-30	170.875	1.89843	0.301053	1.96464e-11	2.39639e-09
Bm006459	304.443	2.65655	0.754215	4.58662e-05	0.000377635	35.9208	2.46547	0.979299	0.000423182	0.007398
Bm093773	180.63	1.48488	0.253073	1.52271e-09	3.21594e-08	58.6603	1.17674	0.438606	0.000604308	0.00970149
Bm055038	136.645	1.9517	0.435797	1.53762e-06	1.82194e-05	28.6482	2.22936	0.449319	5.09941e-08	3.30762e-06
Bm305426	243.551	1.14231	0.366616	0.000852394	0.00481228	96.2736	1.08408	0.266212	5.30265e-06	0.000207025
Bm280081	900.381	2.38095	0.370335	2.09019e-11	5.9332e-10	184.075	1.08237	0.238036	6.36046e-07	3.16609e-05
Bm149566	302.902	1.70477	0.235091	1.09819e-13	4.17364e-12	86.7105	1.42346	0.247105	7.59496e-10	7.15974e-08
Bm263117	1956.88	2.48793	0.452401	5.36174e-09	1.03247e-07	369.084	1.09403	0.185024	4.05219e-10	3.96268e-08
Bm325486	17455.2	2.56996	0.274373	7.7525e-22	5.93336e-20	2680.93	2.33926	0.215432	1.11892e-28	6.07631e-26
Bm164725	3283.74	3.53215	0.277052	3.15417e-38	5.97797e-36	323.906	1.35971	0.176195	1.14722e-15	2.23519e-13
Bm102468	16109.2	2.75586	0.399907	7.35283e-13	2.53946e-11	2304.4	1.85961	0.141568	1.57602e-40	1.51795e-37
Bm067833	123.78	1.837	0.33497	9.98469e-09	1.83167e-07	30.6143	1.56277	0.53221	0.000209934	0.00432379
Bm265769	174.454	2.48143	0.283753	3.58442e-19	2.29841e-17	29.2589	1.86653	0.488774	8.63182e-06	0.00031328
Bm047885	1032.27	3.5201	0.261468	2.73509e-42	6.10606e-40	96.4309	1.63021	0.378503	1.17115e-06	5.48476e-05
Bm306730	151.486	3.39508	0.241192	8.84486e-46	2.3281e-43	14.1413	2.02579	0.659834	0.000132723	0.00301376
Bm149586	497.723	1.59009	0.429421	6.09402e-05	0.000485394	141.019	1.55178	0.303241	2.41318e-08	1.70499e-06
Bm025605	441.092	2.84313	0.184674	2.34787e-54	8.63019e-52	65.8607	1.42964	0.317413	5.53281e-07	2.80053e-05
Bm014956	1241.59	2.41767	0.31631	3.35451e-15	1.51105e-13	227.645	1.62009	0.257048	2.23068e-11	2.68244e-09
Bm196774	248.719	1.3253	0.288612	1.75259e-06	2.05109e-05	88.2488	1.18382	0.362001	9.86877e-05	0.00238061
Bm171002	195.054	1.49995	0.365879	1.3308e-05	0.000126428	46.8105	4.26751	0.518526	2.91532e-17	6.82653e-15
Bm114428	147.712	1.19046	0.195357	5.27307e-10	1.20538e-08	49.8657	2.09145	0.348894	1.42864e-10	1.51146e-08
Bm183461	246.013	1.86128	0.382485	2.59156e-07	3.62409e-06	58.4865	1.81735	0.323417	1.47894e-09	1.31411e-07
Bm325459	20223.3	1.66984	0.3822	4.14179e-06	4.44681e-05	4877.51	2.72499	0.303227	1.50404e-20	4.63907e-18
Bm195435	1294	1.9282	0.292353	1.01551e-11	3.0083e-10	327.865	1.4305	0.127015	2.02159e-30	1.17269e-27
Bm075488	154.634	2.07691	0.458786	1.10854e-06	1.35657e-05	30.996	1.88475	0.540368	2.89231e-05	0.000873116
Bm221754	1607.82	2.18392	0.562443	1.75717e-05	0.000161592	329.975	1.22187	0.399316	0.000183829	0.00389779
Bm235931	288.946	1.68387	0.254613	1.0521e-11	3.11279e-10	83.5745	1.32733	0.354187	1.50381e-05	0.000506533
Bm268834	877.805	2.57382	0.345044	1.2016e-14	5.11977e-13	145.069	1.65732	0.252707	4.25079e-12	5.71779e-10
Bm020383	1596.73	3.18131	0.330358	5.83361e-23	4.81315e-21	188.063	1.5276	0.164492	1.45777e-21	4.91186e-19
Bm304961	1497.7	1.43947	0.365116	2.72001e-05	0.00023762	511.9	1.11353	0.190454	5.96049e-10	5.70319e-08
Bm099475	168.59	1.43402	0.369023	3.48341e-05	0.000295957	49.4337	1.83872	0.466994	5.12206e-06	0.000200588
Bm011402	851.672	1.61664	0.229334	5.4514e-13	1.91337e-11	242.066	1.78224	0.242835	1.58092e-14	2.79152e-12
Bm263129	766.2	1.26503	0.226373	9.95298e-09	1.82603e-07	276.707	1.36321	0.285439	1.5607e-07	9.06876e-06
Bm006080	8462.92	1.67408	0.442455	4.50888e-05	0.000371999	2270.18	1.6727	0.210564	1.5251e-16	3.29182e-14
Bm126430	9908.43	3.49435	0.419112	7.67258e-18	4.428e-16	904.687	1.76921	0.246459	5.13263e-14	8.73352e-12
Bm112286	418.455	1.83522	0.356326	6.12642e-08	9.68164e-07	112.208	1.19062	0.343091	4.84046e-05	0.00134325
Bm324569	186.256	3.12263	0.256711	6.22488e-35	1.00215e-32	18.5869	3.45349	0.689134	5.4685e-08	3.51133e-06
Bm135383	556.343	2.7848	0.317142	2.11232e-19	1.37508e-17	89.1002	1.0697	0.355319	0.00026776	0.00523791
Bm036482	461.334	2.72469	0.144403	3.12783e-80	2.48378e-77	78.9325	1.14145	0.26524	1.80033e-06	7.99144e-05
Bm013362	4577.71	1.33236	0.0936614	2.66489e-46	7.20588e-44	1659.39	1.34526	0.0810575	7.5366e-63	1.26138e-59
Bm148081	4527.2	3.12921	0.490763	2.01455e-11	5.72455e-10	507.183	1.80731	0.194443	1.0698e-21	3.6651e-19
Bm034297	762.737	1.13006	0.37258	0.00112758	0.00609553	311.367	1.02027	0.152958	3.54529e-12	4.8132e-10
Bm334137	1000.58	1.35197	0.243722	1.17607e-08	2.13088e-07	356.645	1.2761	0.149205	1.25815e-18	3.32771e-16
Bm200738	1042.57	2.42054	0.488856	1.10494e-07	1.66107e-06	196.113	1.2138	0.24295	5.96011e-08	3.8007e-06
Bm049777	783.868	2.32521	0.953111	0.00163478	0.00836181	90.688	7.00752	1.4095	5.43583e-08	3.49254e-06
Bm105795	376.043	2.46936	0.658666	2.26698e-05	0.000202354	49.9523	3.25977	0.704065	1.79303e-07	1.02783e-05
Bm013355	599.465	2.22706	0.231869	1.40096e-22	1.12819e-20	132.877	1.27635	0.212015	1.79046e-10	1.85579e-08
Bm005745	246.643	1.95972	0.352047	5.56744e-09	1.06852e-07	61.9247	1.16512	0.366838	0.000140089	0.0031468
Bm257606	3575.64	1.77029	0.412113	4.55975e-06	4.84524e-05	986.874	1.26009	0.187311	1.79411e-12	2.54047e-10
Bm214946	1760.02	3.10569	0.148029	1.20246e-98	1.63987e-95	207.318	2.02195	0.209211	2.91057e-23	1.12986e-20
Bm127578	10573.4	2.21998	0.4114	1.3353e-08	2.39815e-07	1840.34	2.90674	0.216107	1.84215e-42	1.91911e-39
Bm127571	1670.53	1.95469	0.266868	5.36776e-14	2.11917e-12	455.341	1.02785	0.107241	1.33591e-22	4.97768e-20
Bm196115	6964.07	3.95021	0.704081	1.54073e-09	3.25107e-08	420.511	1.75378	0.654721	0.000358875	0.00655087
Bm196583	353.264	4.20346	0.319483	1.44945e-40	3.03095e-38	19.0419	2.19077	0.706996	0.000104584	0.00249415
Bm258994	570.607	1.86543	0.423441	2.43072e-06	2.75528e-05	143.545	1.34966	0.376293	2.63682e-05	0.000811586
Bm162352	1118.94	1.86407	0.309299	3.93405e-10	9.18362e-09	314.627	1.03131	0.201841	4.16994e-08	2.75908e-06
Bm245694	1727.42	3.47635	0.226794	5.35099e-54	1.90369e-51	172.85	1.51356	0.180239	4.17432e-18	1.06013e-15
Bm115177	1236.75	1.77414	0.385175	9.91244e-07	1.2265e-05	313.122	1.77657	0.203998	2.37622e-19	6.68315e-17
Bm044056	474.174	3.0197	0.583322	2.31811e-08	3.97545e-07	54.0827	1.79448	0.387805	2.53114e-07	1.39563e-05
Bm104035	30886.9	3.54748	0.508	3.07127e-13	1.11327e-11	2214.14	3.98815	0.194375	8.31174e-95	2.73735e-91
Bm064531	71.8992	2.05499	0.487466	4.60605e-06	4.89002e-05	11.7713	7.21934	2.76468	2.93575e-06	0.000122787
Bm126278	82.4919	1.59807	0.547128	0.000916924	0.00512303	20.7484	1.88372	0.571394	5.98512e-05	0.00159043
Bm078706	68.3783	1.69916	0.363631	8.11905e-07	1.02418e-05	17.9405	1.55745	0.591388	0.000520105	0.00865096
Bm162339	273.631	2.0047	0.21274	9.74161e-22	7.42853e-20	71.2962	1.06779	0.267053	7.55142e-06	0.000279332
Bm320126	1835.95	2.81898	0.700046	5.8911e-06	6.10181e-05	227.078	1.58983	0.612045	0.000493541	0.00830929
Bm044946	367.107	3.60402	0.503488	7.40427e-14	2.8773e-12	23.8803	8.52902	2.86068	4.40477e-08	2.9013e-06
Bm071642	474.915	1.40344	0.282943	2.58563e-07	3.6174e-06	147.545	1.81702	0.293156	4.12595e-11	4.71179e-09
Bm248753	139.455	1.30433	0.382027	0.00024943	0.0016696	44.1671	1.65263	0.575983	0.000234334	0.00470484
Bm296846	272.809	3.75969	0.739468	2.60749e-08	4.43535e-07	14.6754	7.72455	2.7253	1.52341e-07	8.8875e-06
Bm007516	128.188	2.77323	0.538934	3.15261e-08	5.27956e-07	15.4123	2.4269	0.900589	0.000330858	0.00614044
Bm060996	705.855	4.1775	0.877149	1.24917e-07	1.86035e-06	29.8065	3.64914	0.574114	2.2035e-11	2.65288e-09
Bm059533	331.932	1.6449	0.275484	6.87734e-10	1.54195e-08	84.2097	2.44778	0.354244	3.12234e-13	4.85934e-11
Bm192628	5222.25	1.75441	0.486407	7.83163e-05	0.000605275	1027.24	6.49463	0.526904	3.78092e-36	3.0157e-33
Bm328069	1018.2	1.72893	0.297397	1.62879e-09	3.42308e-08	254.231	2.17427	0.284851	1.4231e-15	2.75169e-13
Bm101819	68.204	1.28146	0.418578	0.000867202	0.00488361	21.9674	1.53871	0.575039	0.000462302	0.00790988
Bm080119	5154.72	1.82577	0.442022	8.66133e-06	8.61369e-05	1341.72	1.38988	0.104301	1.61107e-41	1.61255e-38
Bm180628	438.328	1.20043	0.169231	6.18812e-13	2.16026e-11	170.91	1.16746	0.296654	8.32646e-06	0.000303709
Bm180624	6836.02	3.6737	0.228017	2.07112e-59	9.14981e-57	547.892	2.1656	0.197119	2.96235e-29	1.62601e-26
Bm180625	1416.16	5.57112	0.849993	3.2751e-12	1.04029e-10	28.4377	1.74761	0.630478	0.000299315	0.00569904
Bm133434	80.9156	1.38779	0.341868	1.79782e-05	0.000164903	19.7985	8.287	2.75541	1.13661e-08	8.602e-07
Bm297719	3822.11	2.4639	0.547873	9.46588e-07	1.17597e-05	666.141	1.38525	0.221365	3.53275e-11	4.08925e-09
Bm198381	83.747	1.32985	0.439197	0.000906348	0.00507283	27.455	1.30218	0.491258	0.000591051	0.00953163
Bm199226	914.503	1.57386	0.282125	7.51608e-09	1.41001e-07	298.677	1.05924	0.24954	2.58795e-06	0.000110044
Bm203897	204.958	3.02667	0.382676	3.02317e-16	1.51158e-14	22.7468	2.41608	0.58385	2.24733e-06	9.7261e-05
Bm309757	2362.93	2.07198	0.362233	2.13159e-09	4.39583e-08	487.213	2.15445	0.128809	5.79829e-64	1.02064e-60
Bm061882	3788.6	1.71704	0.458181	4.84791e-05	0.000396925	1058.19	1.25558	0.219774	1.11638e-09	1.02312e-07
Bm014269	477.54	2.37177	0.527829	1.00022e-06	1.23647e-05	93.3509	1.01944	0.335016	0.000257084	0.00507089
Bm026248	2308.01	3.65787	0.259874	5.46847e-46	1.45567e-43	171.726	2.97511	0.254433	9.84617e-33	6.32223e-30
Bm320544	215.842	1.34306	0.352182	5.20172e-05	0.000422457	76.6098	1.1351	0.269842	2.82196e-06	0.000118757
Bm106294	6419.05	1.65296	0.447211	6.03471e-05	0.000481329	1947.59	1.08803	0.0844159	6.32901e-39	5.52269e-36
Bm290283	930.974	1.65272	0.518381	0.000378028	0.00238957	196.188	4.55689	0.420221	1.2891e-28	6.96345e-26
Bm267059	311.257	1.96181	0.436142	1.39e-06	1.664e-05	75.5154	1.23543	0.355763	4.53391e-05	0.00127517
Bm093491	71.2921	1.44214	0.404046	0.000120131	0.000880395	17.0982	4.5176	1.20371	1.67745e-05	0.000554591
Bm259422	265.789	2.58615	0.518754	8.04452e-08	1.24371e-06	43.7314	1.24864	0.387337	0.000108879	0.00256901
Bm119113	1780.72	2.00506	0.365581	8.19333e-09	1.5246e-07	448.306	1.10608	0.246162	7.84992e-07	3.82285e-05
Bm085860	5004.76	4.92979	0.293263	1.30909e-64	6.88185e-62	173.709	2.14318	0.343201	2.56439e-11	3.05138e-09
Bm079192	330.593	2.38794	0.211026	1.84489e-30	2.39949e-28	59.9613	1.86228	0.366322	2.61086e-08	1.82322e-06
Bm294142	6812.32	2.83888	0.605906	3.15931e-07	4.34793e-06	951.091	1.28077	0.253982	4.33831e-08	2.86491e-06
Bm148990	187.29	3.3559	0.271093	4.18744e-36	7.11256e-34	18.501	1.69651	0.642338	0.000473825	0.00805037
Bm299837	1595.14	2.56229	0.612721	3.69368e-06	4.01054e-05	245.619	1.65405	0.207802	1.3672e-16	2.95726e-14
Bm081857	8279.32	2.67289	0.296091	1.66939e-20	1.17362e-18	1221.65	2.1245	0.230672	2.16632e-21	7.11153e-19
Bm191387	108.62	1.38761	0.261282	4.17332e-08	6.82792e-07	38.2633	1.07881	0.3574	0.000266325	0.00521583
Bm043569	129.654	2.68191	0.437924	1.20625e-10	3.06487e-09	16.8421	2.68222	0.760473	2.40977e-05	0.000755135
Bm259353	494.714	2.13061	0.423515	9.23988e-08	1.41079e-06	88.4051	3.00301	0.432354	2.33596e-13	3.68036e-11
Bm032427	455.946	2.34951	0.968283	0.0016272	0.00832981	51.2979	9.62066	3.188	1.92993e-07	1.09707e-05
Bm145017	1138.38	2.88655	0.452507	2.13362e-11	6.04735e-10	146.318	1.84409	0.402555	2.95023e-07	1.60469e-05
Bm275416	605.815	1.61948	0.187366	1.66829e-18	1.02171e-16	196.021	1.078	0.209514	3.28871e-08	2.24644e-06
Bm000850	990.823	2.53687	0.396854	2.2862e-11	6.44874e-10	153.706	2.2015	0.205245	5.48581e-28	2.81441e-25
Bm177066	399.476	1.74264	0.385473	1.54135e-06	1.82602e-05	114.577	1.10633	0.298192	2.18771e-05	0.000696516
Bm278097	412.359	1.72194	0.573067	0.000604428	0.00358762	102.496	1.59862	0.304074	1.1448e-08	8.6512e-07
Bm167697	1227.01	1.45659	0.177105	7.09663e-17	3.7569e-15	421.061	1.24753	0.142504	2.20258e-19	6.2464e-17
Bm135658	239.674	1.27868	0.317116	2.28073e-05	0.000203436	79.5568	1.67649	0.405315	2.40856e-06	0.00010345
Bm260383	893.455	2.28461	0.3828	4.03673e-10	9.40815e-09	174.531	1.5479	0.361992	1.37398e-06	6.32025e-05
Bm023913	526.578	1.92057	0.37045	4.67626e-08	7.56787e-07	137.867	1.1483	0.227457	4.90985e-08	3.18669e-06
Bm082757	553.119	1.03189	0.340431	0.00129035	0.00683526	232.433	1.12451	0.188348	2.78546e-10	2.80176e-08
Bm216695	2086.17	2.80218	0.514382	5.8011e-09	1.10963e-07	241.83	3.25274	0.529928	4.205e-11	4.7967e-09
Bm104521	1871.98	2.60036	0.442727	5.89783e-10	1.33844e-08	294.991	1.74306	0.174228	1.16594e-24	4.79982e-22
Bm170055	908.097	1.95732	0.509135	2.46526e-05	0.000217944	228.125	1.06265	0.200506	1.45339e-08	1.07523e-06
Bm331154	2373.99	2.84991	0.537973	1.41217e-08	2.52639e-07	310.684	1.77179	0.244368	2.97509e-14	5.16562e-12
Bm217117	3755.16	2.2492	0.239944	1.3443e-21	1.01523e-19	676.466	2.71495	0.247102	2.63667e-29	1.45507e-26
Bm149457	548.464	2.36185	0.247782	2.58016e-22	2.04027e-20	100.427	1.94322	0.239807	4.04795e-17	9.35004e-15
Bm261262	2893.65	2.48136	0.189171	4.39237e-40	8.956e-38	525.587	1.62083	0.189871	1.12966e-18	2.99564e-16
Bm311167	784.372	2.29752	0.597345	1.75009e-05	0.000161011	129.552	2.16423	0.464932	1.83563e-07	1.04869e-05
Bm137898	5130.68	1.89664	0.48057	1.76092e-05	0.00016189	1238.46	1.30836	0.472288	0.000399082	0.00708097
Bm052074	135.615	2.33651	0.533085	1.74879e-06	2.04703e-05	23.3925	1.74301	0.504073	3.68406e-05	0.00107035
Bm074281	2022.89	3.71466	0.633421	3.71248e-10	8.70743e-09	141.059	1.90227	0.766307	0.000551685	0.00904073
Bm233639	233.19	1.75318	0.503843	0.000119114	0.000873828	59.2008	1.47921	0.392352	1.1828e-05	0.000411583
Bm208683	92.6225	2.73189	1.00859	0.000582532	0.00347553	8.47741	3.89667	1.25237	0.000240451	0.00480028
Bm299894	170.674	1.58884	0.347936	1.47914e-06	1.76019e-05	53.2931	1.11614	0.317633	4.65096e-05	0.00129985
Bm294196	21873.2	2.56697	0.36133	2.19141e-13	8.07718e-12	3225.89	2.64878	0.268392	3.50131e-24	1.40733e-21
Bm176428	21.3056	-8.68755	2.87267	2.75117e-09	5.5692e-08	202.656	-3.18375	0.252056	9.85441e-38	8.31468e-35
Bm151126	68.3352	-3.35418	0.843147	5.264e-06	5.51327e-05	267.143	-1.58219	0.527559	0.000153824	0.00338679
Bm132841	5.14845	-5.74053	2.85032	0.000304749	0.00198757	181.129	-5.0923	0.577324	6.3e-20	1.85894e-17
Bm304825	73.029	-4.44892	0.675561	3.77035e-12	1.18937e-10	210.874	-1.12297	0.213046	1.53043e-08	1.12815e-06
Bm327945	484.728	-1.88653	0.320321	8.50656e-10	1.87902e-08	1122.49	-1.03121	0.243438	2.73937e-06	0.000115615
Bm322255	274.199	-1.63298	0.294456	8.26235e-09	1.53653e-07	645.449	-1.14945	0.244755	2.77064e-07	1.51346e-05
Bm174259	29.0913	-9.25552	2.90089	6.46475e-11	1.70281e-09	103.567	-1.39997	0.319419	9.43491e-07	4.5117e-05
Bm211749	15.4618	-8.10307	2.82594	4.18578e-08	6.84473e-07	77.2058	-2.02705	0.371374	2.96953e-09	2.49935e-07
Bm094479	9.35976	-7.17224	2.75057	1.42378e-06	1.70032e-05	33.4408	-1.33344	0.415459	0.000105554	0.00251024
Bm327930	1962.3	-2.70968	0.741058	2.53676e-05	0.000223321	5047.76	-1.06413	0.162612	6.9245e-12	9.0427e-10
Bm162245	39.9906	-3.55672	0.763934	2.94863e-07	4.08067e-06	140.586	-1.5338	0.297817	1.97748e-08	1.42577e-06
Bm270991	93.6465	-3.08816	0.565916	4.78604e-09	9.29928e-08	281.936	-1.30671	0.262221	5.60323e-08	3.58881e-06
Bm039619	63.6147	-2.61221	0.800463	0.000111369	0.000824008	191.071	-1.27157	0.355237	2.8425e-05	0.0008619
Bm045054	6.56401	-6.3485	2.79789	5.18893e-05	0.00042169	27.1579	-1.48787	0.564356	0.000502313	0.00842088
Bm335125	174.165	-1.31782	0.451049	0.00125125	0.00666035	476.7	-1.39771	0.450233	0.000128189	0.00293426
Bm072249	117.903	-2.00742	0.346191	1.35256e-09	2.8828e-08	325.178	-1.34445	0.284175	1.9073e-07	1.08602e-05
Bm209449	81.5524	-6.34246	0.700147	5.82637e-20	3.94005e-18	259.231	-1.23604	0.262548	2.37477e-07	1.32053e-05
Bm321374	66.0011	-6.00563	1.09194	2.3916e-09	4.88705e-08	240.315	-1.51346	0.266727	1.09125e-09	1.00279e-07
Bm271857	7.41459	-6.64144	2.77619	1.7165e-05	0.000158359	37.7263	-1.93313	0.538934	1.87876e-05	0.00061125
Bm106598	242.829	-1.29314	0.31429	1.53288e-05	0.000143283	514.263	-1.06216	0.239603	1.08024e-06	5.08934e-05
Bm016966	20.4193	-3.44949	0.680283	5.53338e-08	8.82448e-07	88.891	-1.89489	0.387505	6.26161e-08	3.96571e-06
Bm162233	234.537	-2.28289	0.416118	6.44365e-09	1.2221e-07	684.623	-1.39296	0.261714	8.31135e-09	6.45277e-07
Bm198649	39.0523	-9.74559	2.97259	1.42088e-11	4.11018e-10	134.485	-1.33345	0.329869	4.35513e-06	0.000173685
Bm194274	4.92148	-5.14791	3.23198	0.00199227	0.00988225	156.201	-4.62994	1.04855	3.59915e-07	1.91481e-05
Bm232232	30.2059	-1.87088	0.402798	8.13039e-07	1.02521e-05	76.6956	-1.12534	0.365036	0.00019122	0.00401118
Bm267334	411.315	-3.23953	0.391418	1.24213e-17	7.04122e-16	1285.12	-1.38898	0.231326	1.65916e-10	1.73201e-08
Bm208171	160.341	-9.68399	1.3107	9.99477e-17	5.22647e-15	834.462	-1.95894	0.559798	2.32214e-05	0.000732624
Bm197304	32.9869	-9.49028	2.91443	9.20041e-12	2.74494e-10	110.201	-1.31525	0.259994	3.82958e-08	2.55708e-06
Bm210489	11.745	-2.31365	0.864659	0.000992488	0.00547725	38.5982	-1.3868	0.484698	0.000289819	0.00555763
Bm022381	103.375	-2.08993	0.6017	8.30194e-05	0.000636422	332.143	-1.58029	0.302585	1.28715e-08	9.63419e-07
Bm030423	15.7903	-8.04846	2.90208	3.31202e-07	4.54051e-06	74.2554	-1.81013	0.498696	1.62264e-05	0.000539438
Bm273607	6.88135	-6.35071	2.87285	9.00157e-05	0.000683403	33.1156	-1.87622	0.484922	6.82271e-06	0.000256464
Bm159917	33.9255	-2.61895	0.744744	4.84873e-05	0.000396975	100.892	-1.18742	0.43818	0.000535437	0.00883831
Bm234486	23.5406	-2.27802	0.461748	1.53425e-07	2.24791e-06	101.953	-2.14844	0.249848	5.83329e-19	1.56722e-16
Bm159913	26.0151	-5.52581	0.973155	5.38421e-09	1.03641e-07	186.859	-2.72007	0.329156	7.90844e-18	1.96928e-15
Bm058326	97.0699	-2.8312	0.894288	0.0001341	0.000970816	398.845	-1.88269	0.33023	7.60401e-10	7.16166e-08
Bm286928	46.0306	-6.96072	1.02262	2.44432e-11	6.87211e-10	145.886	-1.24928	0.20866	2.16297e-10	2.22159e-08
Bm030896	41.6042	-2.61703	0.592941	1.30546e-06	1.5741e-05	118.949	-1.22046	0.319292	1.20887e-05	0.000419394
Bm030893	283.206	-2.21823	0.296292	1.20721e-14	5.14249e-13	676.855	-1.05009	0.182241	1.03486e-09	9.53547e-08
Bm111972	259.417	-6.61521	0.398434	5.64837e-62	2.66421e-59	805.303	-1.24855	0.124021	8.10148e-25	3.3898e-22
Bm018755	379.165	-1.29518	0.315558	1.60655e-05	0.000149368	780.92	-1.0491	0.144636	5.29003e-14	8.97144e-12
Bm058336	161.902	-3.09218	0.28987	1.59872e-27	1.74929e-25	461.837	-1.17535	0.306033	1.16229e-05	0.000406103
Bm310656	19.6831	-4.53007	1.16366	1.04121e-05	0.000101623	77.3254	-1.67613	0.3012	1.96891e-09	1.70785e-07
Bm270596	77.7035	-7.22924	0.868965	2.03545e-16	1.03337e-14	318.69	-1.75699	0.210677	5.38938e-18	1.35523e-15
Bm156434	18.6945	-8.47653	2.83308	3.60595e-09	7.15181e-08	76.9696	-1.4823	0.565155	0.000498019	0.00837227
Bm146636	1117.35	-5.7746	0.537711	3.83844e-28	4.39946e-26	4201.05	-1.41275	0.493564	0.000263536	0.00517015
Bm081594	21.5848	-2.94816	0.679618	1.64836e-06	1.9402e-05	108.255	-2.27825	0.280506	3.12954e-17	7.31137e-15
Bm309656	477.546	-4.07572	0.226347	1.51791e-73	1.02024e-70	1275.57	-1.02221	0.153177	3.33084e-12	4.54624e-10
Bm323959	22.422	-6.61868	1.39955	6.6651e-08	1.04635e-06	73.7749	-1.17424	0.412089	0.000366461	0.00665247
Bm199592	5.85469	-6.12851	2.77681	8.02854e-05	0.000618284	25.7694	-1.69827	0.483997	2.95455e-05	0.000889797
Bm202441	12.4354	-5.5709	1.53308	1.39229e-05	0.000131639	56.926	-1.82035	0.454742	3.82902e-06	0.000155065
Bm247343	102.981	-8.96186	1.42147	1.46254e-12	4.85534e-11	475.295	-1.88517	0.380458	4.40855e-08	2.90191e-06
Bm260314	40.2221	-7.5507	1.37648	6.05215e-10	1.37065e-08	185.409	-1.92596	0.298725	7.4135e-12	9.56857e-10
Bm143532	8.69165	-6.96794	2.78501	5.80101e-06	6.01612e-05	39.6336	-1.71614	0.535852	7.77051e-05	0.00197246
Bm226426	425.822	-5.31503	0.931691	6.20001e-10	1.40127e-08	1436.18	-1.27395	0.393198	9.31526e-05	0.00227738
Bm188447	6.55315	-6.4117	2.74426	2.64192e-05	0.000231505	27.0978	-1.60449	0.451928	2.70331e-05	0.000828307
Bm110681	136.211	-6.00356	0.546434	6.27071e-29	7.55048e-27	421.78	-1.13829	0.319151	3.4895e-05	0.00101963
Bm316395	26.2467	-1.87213	0.549451	0.000138686	0.00100037	78.7956	-1.46026	0.360172	3.77188e-06	0.000153055
Bm082008	4.75818	-5.55478	2.85897	0.000450879	0.00278377	80.5259	-3.31526	1.36704	0.00036877	0.00667786
Bm040635	15.0384	-5.92717	1.47596	2.62109e-06	2.95099e-05	84.1519	-2.22959	0.416276	4.94806e-09	3.9699e-07
Bm333823	47.9392	-5.56726	0.669457	4.89382e-17	2.62996e-15	137.976	-1.06445	0.221351	1.83659e-07	1.04869e-05
Bm329210	18.2765	-1.88613	0.701186	0.00135244	0.00711649	48.9627	-1.22193	0.31773	1.15186e-05	0.000403284
Bm174271	1075.34	-2.86582	0.359443	1.79027e-16	9.14815e-15	2725.93	-1.00392	0.237338	2.91424e-06	0.000122037
Bm084650	69.6337	-3.17854	1.12942	0.000315558	0.00204757	205.22	-1.08188	0.399168	0.00061329	0.00981399
Bm139062	252.803	-2.68351	0.525718	3.88338e-08	6.393e-07	651.753	-1.04743	0.250361	3.33579e-06	0.000137761
Bm027677	25.313	-1.97291	0.555877	7.60528e-05	0.000590132	68.4414	-1.24699	0.318304	8.10185e-06	0.000296895
Bm018259	66.8657	-8.35569	1.33024	1.74239e-12	5.71381e-11	191.153	-1.00925	0.222622	7.40609e-07	3.63272e-05
Bm046722	65.7543	-10.6718	3.02812	4.06277e-15	1.81273e-13	216.721	-1.32704	0.185298	7.57606e-14	1.25972e-11
Bm136406	161.068	-2.47101	0.501695	1.13899e-07	1.70897e-06	543.142	-1.54754	0.402252	7.9701e-06	0.000292592
Bm295356	12.5207	-3.34859	0.850467	1.13042e-05	0.000109324	42.1321	-1.36387	0.407833	6.34173e-05	0.00166783
Bm238314	194.673	-3.80235	0.244789	3.30704e-55	1.2548e-52	517.791	-1.03631	0.14595	1.63224e-13	2.60786e-11
Bm193440	62.8	-4.60041	0.887063	1.6206e-08	2.8692e-07	244.894	-1.66417	0.303519	2.93924e-09	2.4759e-07
Bm043694	19.4311	-8.5523	2.83332	1.98313e-09	4.11129e-08	83.227	-1.54272	0.582658	0.000439737	0.00761181
Bm314189	10.95	-7.47361	2.7686	4.40251e-07	5.8804e-06	38.2352	-1.24478	0.451841	0.000454663	0.00780797
Bm332516	57.1161	-6.69841	0.960754	1.41972e-12	4.72484e-11	188.489	-1.23719	0.344089	2.78673e-05	0.000847655
Bm036913	24.2076	-8.94215	2.86695	2.57907e-10	6.21165e-09	118.765	-2.06271	0.249279	9.16366e-18	2.27629e-15
Bm216510	27.296	-9.16492	2.88034	4.88244e-11	1.30819e-09	79.8792	-1.01851	0.280511	3.36613e-05	0.000991522
Bm179149	299.501	-3.90463	0.244214	1.47303e-58	6.25785e-56	801.883	-1.0054	0.218511	5.37949e-07	2.72969e-05
Bm295376	194.028	-2.71238	0.269679	1.16519e-24	1.06398e-22	493.482	-1.1006	0.124593	1.254e-19	3.66835e-17
Bm176081	102.086	-11.3912	3.11314	1.13902e-16	5.9265e-15	348.285	-1.34677	0.282245	1.5533e-07	9.03602e-06
Bm176082	76.8916	-1.99225	0.560772	6.94859e-05	0.000544883	260.087	-1.56858	0.472848	5.53728e-05	0.00150024
Bm268184	73.7686	-2.84129	0.518427	4.61001e-09	8.99347e-08	206.091	-1.15152	0.318984	2.94209e-05	0.000886569
Bm240629	14.131	-7.96589	2.79208	4.0729e-08	6.67465e-07	43.5623	-1.0837	0.333465	0.000121799	0.00281334
Bm021418	5.49806	-5.47175	3.16153	0.00123772	0.0066003	46.9428	-2.8097	0.630992	4.26016e-07	2.21793e-05
Bm143190	555.355	-7.69747	0.663969	6.81808e-32	9.56865e-30	2062.88	-1.50157	0.319745	1.9728e-07	1.11585e-05
Bm004092	11.5711	-4.22757	0.982594	4.17637e-06	4.47802e-05	38.0164	-1.27546	0.374595	5.72027e-05	0.00153501
Bm315480	854.003	-3.12538	0.186819	8.71753e-64	4.39847e-61	2159.63	-1.03197	0.0957727	6.14936e-28	3.12345e-25
Bm058750	475.834	-2.21499	0.25263	3.13446e-19	2.01607e-17	1141.86	-1.05695	0.187509	2.14038e-09	1.84094e-07
Bm114656	121.418	-4.45352	0.576433	9.73762e-16	4.63014e-14	400.384	-1.36107	0.284052	1.39096e-07	8.16613e-06
Bm320821	22.1229	-2.57501	1.10346	0.00168734	0.00858817	82.2818	-1.67851	0.349119	1.06716e-07	6.43918e-06
Bm073912	6.3612	-6.30195	2.78373	5.26665e-05	0.000427066	23.1337	-1.29778	0.488677	0.000590506	0.00952918
Bm275716	35.3512	-3.27075	0.585823	2.71189e-09	5.49676e-08	157.878	-2.04335	0.257437	1.36332e-16	2.95563e-14
Bm241508	245.353	-2.74615	0.362785	4.74139e-15	2.10107e-13	609.958	-1.02985	0.150191	8.92937e-13	1.32698e-10
Bm124885	189.313	-5.42668	0.369615	2.03021e-49	6.10358e-47	572.098	-1.08969	0.337585	0.000123375	0.00284332
Bm333417	1222.62	-6.74628	0.289978	2.51669e-120	5.84738e-117	4381.22	-1.51	0.192953	4.15124e-16	8.56196e-14
Bm134688	28.9632	-4.19886	0.64263	1.2168e-11	3.55924e-10	97.1064	-1.24637	0.464532	0.000531269	0.00878484
Bm043623	231.224	-7.3328	0.595902	4.79621e-35	7.75465e-33	743.562	-1.31024	0.130305	8.61714e-25	3.59085e-22
Bm043624	1232.16	-4.81373	0.325925	1.58774e-50	4.97189e-48	4237.14	-1.48053	0.187223	2.20276e-16	4.71465e-14
Bm241510	244.534	-4.43865	0.40389	3.4903e-29	4.25434e-27	799.176	-1.35087	0.281075	1.3056e-07	7.72914e-06
Bm335606	471.68	-3.46011	0.344354	8.67159e-25	7.98036e-23	1270.78	-1.10946	0.122337	1.46163e-20	4.52193e-18
Bm082879	162.533	-6.10523	0.945564	6.65412e-12	2.02147e-10	684.666	-1.70328	0.3984	1.19839e-06	5.58924e-05
Bm138664	165.905	-2.63375	0.469935	2.57466e-09	5.23158e-08	497.771	-1.37616	0.262007	1.27554e-08	9.56834e-07
Bm016913	46.9407	-2.57777	0.533039	1.66516e-07	2.42274e-06	143.405	-1.42498	0.249442	9.5493e-10	8.87911e-08
Bm021024	169.071	-6.65995	0.641806	3.16417e-26	3.20848e-24	542.095	-1.22346	0.298212	3.74339e-06	0.00015208
Bm231764	578.028	-3.28181	0.306457	9.13603e-28	1.02162e-25	1658.24	-1.26341	0.117534	6.03969e-28	3.08308e-25
Bm087678	59.9703	-3.36465	0.543456	5.705e-11	1.51222e-09	177.664	-1.18018	0.34212	5.07286e-05	0.00139368
Bm150783	114.832	-8.33813	1.00806	9.5255e-16	4.53616e-14	371.035	-1.14311	0.38636	0.000270299	0.00527546
Bm025878	5.47196	-4.08157	1.62516	0.000787146	0.004491	27.0109	-1.8377	0.633685	0.00019381	0.00405635
Bm000557	8.46883	-6.94844	2.75652	4.32563e-06	4.62177e-05	35.2742	-1.59683	0.466954	4.10566e-05	0.00117216
Bm140504	7.24684	-2.38829	0.884477	0.00111637	0.00604672	29.689	-1.7883	0.505726	2.48372e-05	0.000773796
Bm278866	13.9578	-4.86689	1.37529	6.25255e-05	0.000496676	94.8665	-2.43615	0.615836	3.59355e-06	0.000146928
Bm249053	28.5952	-4.53711	0.963474	1.99736e-07	2.85835e-06	89.4286	-1.11631	0.412816	0.000598349	0.00961559
Bm287347	162.015	-7.93479	0.756401	2.91471e-25	2.7579e-23	678.067	-1.74497	0.296833	2.83648e-10	2.84468e-08
Bm113342	9.76835	-7.07937	2.88438	1.27109e-05	0.000121443	43.5273	-1.64042	0.581333	0.000261561	0.00514054
Bm063244	231.466	-4.84492	0.323993	2.1634e-51	6.91256e-49	766.596	-1.34044	0.294494	4.49035e-07	2.31651e-05
Bm063252	101.425	-3.32846	1.34923	0.000694329	0.00403757	456.335	-1.97104	0.314032	2.17405e-11	2.62052e-09
Bm282903	13.036	-2.62622	1.13887	0.00191661	0.00956468	48.5882	-1.54011	0.499856	0.000128359	0.00293695
Bm114664	174.707	-12.2209	3.2604	2.16152e-16	1.09442e-14	905.431	-1.91247	0.589746	5.75889e-05	0.00154223
Bm310190	30.0994	-1.45145	0.487174	0.000915872	0.00511807	92.6339	-1.70203	0.277038	5.95159e-11	6.60458e-09
Bm268605	118.664	-2.59669	0.315382	2.4748e-17	1.36265e-15	344.013	-1.249	0.362021	4.6673e-05	0.0013037
Bm240272	182.331	-5.08071	0.669161	1.98648e-15	9.19011e-14	932.747	-1.97949	0.569245	2.50109e-05	0.000777784
Bm024974	500.463	-4.68829	0.237246	5.55636e-88	5.56224e-85	1463.87	-1.1667	0.164389	1.25396e-13	2.03532e-11
Bm233994	20.6689	-8.67008	2.83825	8.62829e-10	1.9039e-08	101.803	-1.99143	0.387015	1.62724e-08	1.19262e-06
Bm205025	563.033	-5.17271	0.415435	9.59953e-37	1.67435e-34	2042.33	-1.55256	0.236705	4.33039e-12	5.80193e-10
Bm335665	60.7556	-4.44991	1.6336	0.000224861	0.00152791	200.564	-1.27032	0.366023	4.2576e-05	0.0012084
Bm100082	14.6112	-3.41858	1.0124	6.60124e-05	0.000520944	60.3092	-1.66673	0.534343	0.000102968	0.00246481
Bm269923	14.6033	-4.51797	1.12177	9.2042e-06	9.09493e-05	70.7496	-1.9504	0.484876	3.26442e-06	0.000135259
Bm152924	7.28472	-6.55757	2.81151	3.15694e-05	0.000271241	28.7608	-1.47844	0.481378	0.000144513	0.00322372
Bm152925	34.9413	-4.18904	0.618631	1.98835e-12	6.47975e-11	102.709	-1.13129	0.283133	6.69826e-06	0.000252344
Bm098351	13.7953	-7.93143	2.78065	3.73479e-08	6.17106e-07	43.6922	-1.14966	0.329138	4.77357e-05	0.00132794
Bm076580	31.5134	-9.31304	3.00157	1.57409e-09	3.31702e-08	141.189	-1.73691	0.488437	2.16132e-05	0.000689124
Bm249095	81.3242	-11.0298	3.06414	3.13896e-16	1.56739e-14	243.128	-1.11309	0.204917	6.34008e-09	5.0216e-07
Bm334340	28.6621	-3.04647	0.801848	1.40994e-05	0.000133121	295.41	-3.13422	0.80347	3.71713e-06	0.000151133
Bm147128	76.9037	-10.9246	3.06417	1.91545e-15	8.88115e-14	263.074	-1.39283	0.206743	1.45602e-12	2.09367e-10
Bm135137	90.8527	-6.50775	0.712159	3.04982e-20	2.11097e-18	304.197	-1.22869	0.405007	0.000192393	0.00403272
Bm000542	25.908	-2.20795	0.581872	2.36106e-05	0.000209895	70.553	-1.23196	0.286731	1.6765e-06	7.50045e-05
Bm217034	712.517	-8.46748	0.520531	1.6057e-59	7.14402e-57	2056.78	-1.04609	0.204699	3.94846e-08	2.63129e-06
Bm310161	20.1303	-2.3057	0.623225	3.45776e-05	0.00029407	133.204	-2.59507	0.672381	4.98681e-06	0.000195892
Bm255741	57.5397	-1.26818	0.427207	0.00115649	0.00622731	188.901	-1.94465	0.17947	1.81463e-28	9.75066e-26
Bm169368	267.487	-3.37038	0.630887	7.66703e-09	1.43504e-07	856.41	-1.38945	0.266288	1.52381e-08	1.12407e-06
Bm089428	100.886	-2.01094	0.338068	5.40393e-10	1.23379e-08	394.781	-2.07334	0.152048	1.72416e-43	1.87262e-40
Bm154518	431.828	-3.64582	0.364401	1.25592e-24	1.14264e-22	1483.15	-1.52473	0.254506	1.61476e-10	1.68911e-08
Bm335691	6.38122	-6.16181	2.88767	0.000153905	0.00109595	65.6978	-3.20486	0.511191	2.0621e-11	2.50033e-09
Bm001139	446.258	-5.43335	0.291317	1.089e-78	8.26403e-76	1524.93	-1.44522	0.183774	3.20199e-16	6.71262e-14
Bm047373	147.541	-9.52884	1.34649	2.33368e-15	1.07043e-13	434.233	-1.0726	0.229258	3.36434e-07	1.8002e-05
Bm118412	8.76841	-3.70582	1.09002	0.000112698	0.000832207	27.9379	-1.18378	0.423959	0.000451856	0.00777153
Bm018816	924.437	-1.68178	0.324616	5.8246e-08	9.24504e-07	2254.98	-1.20579	0.256805	2.5854e-07	1.4214e-05
Bm110921	131.983	-3.64559	0.357333	1.66657e-25	1.60844e-23	395.831	-1.30099	0.148758	2.2095e-19	6.24866e-17
Bm334376	9.74195	-7.24	2.7616	1.2506e-06	1.51388e-05	34.4	-1.30377	0.422724	0.000161264	0.00352475
Bm025595	10.1848	-7.20756	2.85496	5.82188e-06	6.03642e-05	43.8572	-1.58085	0.55331	0.000246623	0.00490526
Bm233884	104.777	-2.66291	0.345076	1.55995e-15	7.31026e-14	272.226	-1.10941	0.218655	4.41646e-08	2.90524e-06
Bm222304	121.151	-5.17296	0.407529	1.39559e-37	2.54751e-35	378.046	-1.26535	0.188473	1.88003e-12	2.64744e-10
Bm023380	20.5915	-8.54119	2.93325	4.57247e-08	7.41328e-07	85.784	-1.57148	0.511951	0.000126885	0.00291107
Bm189608	34.4606	-3.45075	0.506722	1.50302e-12	4.98092e-11	115.157	-1.45868	0.292067	4.87695e-08	3.16735e-06
Bm202707	28.3963	-5.57315	1.10126	8.15357e-08	1.25943e-06	105.947	-1.45053	0.41588	3.39846e-05	0.000998191
Bm202706	50.0862	-4.44511	0.873662	2.64868e-08	4.50134e-07	161.731	-1.22304	0.377317	9.94212e-05	0.00239494
Bm212981	29.104	-7.06437	1.35252	3.55167e-09	7.05013e-08	104.657	-1.44331	0.308565	2.31714e-07	1.2913e-05
Bm283711	319.617	-7.27964	0.530953	2.38984e-43	5.58715e-41	1163.14	-1.51794	0.23848	1.52181e-11	1.88096e-09
Bm078907	180.132	-4.69028	0.315694	1.13639e-50	3.58837e-48	524.079	-1.12636	0.213384	1.43983e-08	1.06675e-06
Bm096798	66.544	-3.98252	0.591309	1.48697e-12	4.93213e-11	208.06	-1.28809	0.268079	1.41022e-07	8.26965e-06
Bm241036	289.01	-3.35351	0.329709	2.7291e-25	2.58488e-23	762.218	-1.05044	0.182331	1.04429e-09	9.61373e-08
Bm026426	17.4317	-2.51559	0.668811	2.45763e-05	0.000217351	79.1759	-1.91947	0.606539	7.66673e-05	0.00195026
Bm086515	4.25582	-5.0245	3.06701	0.00174105	0.00881719	28.7071	-2.18452	0.838045	0.000366813	0.00665502
Bm197682	65.0223	-4.27633	0.461701	2.55728e-21	1.8933e-19	181.212	-1.03946	0.250913	4.07902e-06	0.000163889
Bm025547	45.6661	-1.62501	0.538344	0.000647338	0.00380392	107.333	-1.04861	0.321587	0.000119208	0.00276286
Bm231282	5.13035	-5.79439	2.80771	0.000219108	0.00149384	20.9521	-1.49934	0.530629	0.000310941	0.00585705
Bm187401	69.6657	-3.37903	0.510199	3.71196e-12	1.17252e-10	228.477	-1.33501	0.404072	7.04149e-05	0.00182091
Bm202712	515.569	-7.34632	0.462233	5.74882e-58	2.39894e-55	1547.7	-1.17407	0.126163	1.50299e-21	5.03103e-19
Bm313610	7.95561	-6.7798	2.79064	1.21309e-05	0.000116492	66.1822	-2.91456	0.387173	3.46355e-15	6.47633e-13
Bm330815	7.74894	-4.01802	1.19619	0.000172417	0.00121091	32.4164	-1.73754	0.413353	1.8469e-06	8.16104e-05
Bm312769	78.7783	-6.55266	0.710118	2.29826e-20	1.60196e-18	397.985	-2.14911	0.210682	1.27594e-25	5.63922e-23
Bm246784	198.674	-5.43876	0.409213	4.27194e-41	9.10505e-39	733.227	-1.52498	0.314704	9.26275e-08	5.6627e-06
Bm061255	27.8105	-2.66279	1.10537	0.00131047	0.00692546	150.963	-2.18095	0.602748	1.39887e-05	0.000475366
Bm067800	43.3166	-9.95033	2.96973	1.10812e-12	3.74008e-11	141.893	-1.21849	0.327217	1.75662e-05	0.0005765
Bm247609	330.965	-5.43422	0.742221	1.44072e-14	6.07532e-13	1213.89	-1.5898	0.165093	4.82818e-23	1.85311e-20
Bm125170	166.052	-2.75974	0.364297	4.28208e-15	1.90606e-13	496.608	-1.23967	0.403719	0.000166266	0.00360706
Bm138489	43.1406	-1.94266	0.361466	1.74734e-08	3.07247e-07	138.071	-1.61702	0.334263	9.28045e-08	5.67012e-06
Bm185689	848.188	-3.69568	0.617609	1.70045e-10	4.22585e-09	2237.47	-1.01072	0.164949	1.2028e-10	1.2845e-08
Bm085235	167.172	-12.2011	3.20519	8.78764e-19	5.49079e-17	579.852	-1.40924	0.231527	9.92267e-11	1.06974e-08
Bm108635	248.373	-3.2228	0.330636	2.05878e-23	1.75005e-21	658.549	-1.07744	0.187841	1.16838e-09	1.0622e-07
Bm324727	6.19375	-6.20622	2.80966	8.34777e-05	0.000639363	32.1533	-1.98398	0.526763	9.62958e-06	0.00034544
Bm204913	35.9741	-2.60382	0.521867	8.37864e-08	1.29039e-06	90.4542	-1.00256	0.261355	1.56111e-05	0.000523244
Bm142985	23.8149	-8.91488	2.86373	2.86488e-10	6.83963e-09	73.0467	-1.09918	0.300453	2.68841e-05	0.000824733
Bm302954	24.0401	-3.31163	0.65189	4.81656e-08	7.77287e-07	87.0177	-1.59084	0.342344	2.42722e-07	1.3475e-05
Bm014409	61.6348	-4.91287	0.690596	1.39623e-13	5.26168e-12	179.781	-1.11854	0.208349	9.01593e-09	6.93127e-07
Bm070558	20.5857	-8.65032	2.84565	1.39697e-09	2.96715e-08	102.656	-2.0541	0.321398	1.04622e-11	1.32384e-09
Bm052328	19.4291	-6.36427	1.40981	2.05415e-07	2.93248e-06	74.4684	-1.44015	0.480711	0.000177526	0.00380923
Bm192873	20.3891	-2.65999	1.06911	0.00114055	0.00615576	96.7894	-1.87259	0.66135	0.000213522	0.00437914
Bm330849	290.456	-2.86974	0.547549	1.672e-08	2.94937e-07	865.122	-1.25789	0.343135	2.07276e-05	0.000664834
Bm213897	24.1306	-8.89441	2.90148	1.54671e-09	3.26334e-08	74.6054	-1.04627	0.377889	0.000557287	0.00910768
Bm208059	435.896	-2.25178	0.162122	1.23079e-44	3.07205e-42	1299.29	-1.48952	0.219971	1.04136e-12	1.52754e-10
Bm006418	64.6938	-4.16072	0.89746	2.27293e-07	3.21311e-06	190.842	-1.18141	0.198923	3.093e-10	3.07774e-08
Bm051463	49.4022	-2.40888	0.379352	3.66135e-11	1.00373e-09	146.997	-1.33153	0.370075	2.50417e-05	0.000778266
Bm121690	243.29	-4.52676	0.537341	2.79852e-18	1.68214e-16	874.637	-1.52615	0.298546	2.39234e-08	1.69261e-06
Bm006444	376.787	-3.76169	0.468197	7.81238e-17	4.11844e-15	1077.55	-1.04776	0.357755	0.000340792	0.00628143
Bm090182	42.5814	-3.07529	0.495187	6.62743e-11	1.74274e-09	119.513	-1.16543	0.261559	8.59714e-07	4.14213e-05
Bm253084	60.2921	-6.42012	0.904467	4.76035e-13	1.68559e-11	173.887	-1.00285	0.279223	3.93363e-05	0.00113095
Bm265062	59.5841	-5.73051	0.925107	5.44778e-11	1.44905e-09	292.67	-1.96574	0.466946	1.41795e-06	6.48874e-05
Bm102950	57.0201	-3.68292	0.922306	4.67759e-06	4.95814e-05	176.807	-1.31549	0.197658	2.70936e-12	3.73797e-10
Bm130587	87.6912	-6.43812	0.779051	4.29098e-17	2.31924e-15	283.635	-1.18112	0.363133	0.000100132	0.00240878
Bm205838	124.233	-1.80145	0.460749	2.07705e-05	0.000187518	305.002	-1.11643	0.307929	2.89143e-05	0.000873107
Bm190657	9.8029	-4.39765	1.24544	8.92954e-05	0.000678262	35.6999	-1.36857	0.478657	0.00029604	0.00565355
Bm017528	74.0068	-3.46494	0.464081	7.87496e-15	3.41684e-13	222.801	-1.25066	0.281715	8.27467e-07	4.00946e-05
Bm135809	43.4158	-6.86149	1.03056	5.35322e-11	1.4262e-09	123.739	-1.0052	0.235977	2.59842e-06	0.000110397
Bm050578	6.1929	-5.92419	3.01417	0.000435637	0.00270103	48.1555	-2.39235	0.903537	0.000293475	0.00561507
Bm084758	187.257	-12.3958	3.20193	2.42328e-20	1.68693e-18	1890.73	-3.30251	0.167308	5.63793e-88	1.69294e-84
Bm306496	265.547	-3.13386	0.322614	2.88038e-23	2.42218e-21	719.425	-1.0921	0.264022	3.83781e-06	0.00015536
Bm085601	37.1968	-3.93458	0.904645	1.00697e-06	1.24383e-05	204.035	-2.17261	0.533529	2.35249e-06	0.000101169
Bm179838	102.679	-4.11131	0.663738	3.94266e-11	1.07475e-09	278.054	-1.01394	0.196953	3.45675e-08	2.34366e-06
Bm132307	14.357	-1.76495	0.608521	0.000852454	0.00481228	39.3023	-1.27124	0.384515	8.03789e-05	0.00202522
Bm058499	32.0194	-2.60326	0.545527	2.41496e-07	3.39529e-06	90.7241	-1.23735	0.293579	2.35433e-06	0.000101205
Bm331754	30.7183	-2.10348	0.653973	0.000213515	0.00146052	128.607	-1.96809	0.44858	6.58042e-07	3.26127e-05
Bm163498	58.9685	-3.48171	0.557019	3.7193e-11	1.01814e-09	193.536	-1.43542	0.265783	5.5057e-09	4.38455e-07
Bm223277	21.8893	-5.73633	1.11517	1.24633e-07	1.85671e-06	74.4963	-1.35231	0.312715	1.31461e-06	6.08403e-05
Bm026459	105.142	-2.0466	0.425262	2.77524e-07	3.86086e-06	295.312	-1.38759	0.243198	1.0067e-09	9.30965e-08
Bm307791	455.08	-7.693	1.32174	2.07849e-10	5.0854e-09	1398.78	-1.18667	0.198487	2.37365e-10	2.41851e-08
Bm152393	1196.62	-11.2367	0.861989	9.33789e-38	1.72971e-35	4410.42	-1.53857	0.209114	1.50996e-14	2.67636e-12
Bm258331	4.08197	-5.02347	2.99478	0.00151233	0.00782523	36.1494	-2.97387	0.47305	2.40016e-11	2.8684e-09
Bm064700	26.8503	-6.92857	1.34697	5.63521e-09	1.08064e-07	79.5096	-1.02923	0.316994	0.00013069	0.00297915
Bm032689	83.4683	-6.92084	0.812025	1.06288e-17	6.0616e-16	242.999	-1.03667	0.26447	1.03442e-05	0.000366058
Bm179494	76.8186	-10.9347	3.05292	5.6431e-16	2.76425e-14	986.112	-3.6735	0.205077	5.12453e-73	1.11316e-69
Bm203560	14.3635	-7.97547	2.80951	6.11468e-08	9.66633e-07	67.4965	-1.89878	0.396863	1.07783e-07	6.49201e-06
Bm314069	563.864	-4.64009	0.601818	8.23531e-16	3.95679e-14	1644.15	-1.1221	0.234174	1.79074e-07	1.0271e-05
Bm134111	78.6225	-1.50489	0.267437	6.0033e-09	1.14504e-07	180.546	-1.14388	0.25572	8.03741e-07	3.90377e-05
Bm158541	16.583	-8.12316	2.92047	3.27778e-07	4.49683e-06	501.365	-4.90477	0.456556	3.23291e-28	1.68398e-25
Bm224493	1156.35	-6.58666	0.383987	4.08737e-67	2.33811e-64	3688.68	-1.20242	0.31961	1.53085e-05	0.000514112
Bm219933	940.713	-3.78072	0.31863	1.48822e-33	2.24965e-31	2517.21	-1.03294	0.180225	1.27394e-09	1.14896e-07
Bm189276	318.96	-1.27568	0.436724	0.00132194	0.00697451	814.778	-1.38748	0.308957	5.68143e-07	2.86439e-05
Bm145256	42.2902	-3.47314	0.600212	7.53094e-10	1.6798e-08	201.141	-2.07088	0.383844	4.01363e-09	3.2834e-07
Bm039271	13.0537	-7.78946	2.80361	1.62658e-07	2.37175e-06	42.9585	-1.16142	0.411113	0.000412924	0.00726224
Bm116711	33.2988	-1.30588	0.45528	0.00153841	0.00793528	73.3367	-1.08658	0.268837	6.00775e-06	0.000230498
Bm177279	13.3912	-7.71813	2.89685	1.38715e-06	1.66079e-05	216.175	-3.93118	0.478539	1.09154e-17	2.6724e-15
Bm066017	249.577	-4.65713	0.310366	6.79315e-52	2.20806e-49	730.258	-1.14613	0.207005	3.36992e-09	2.79487e-07
Bm177278	14.8707	-7.92587	2.901	5.89065e-07	7.65671e-06	164.201	-3.32425	0.48057	2.33027e-13	3.67707e-11
Bm086099	20.292	-8.60899	2.85758	3.0042e-09	6.04434e-08	78.0762	-1.55342	0.325493	1.37129e-07	8.0599e-06
Bm205788	353.901	-2.65784	0.223894	2.35877e-33	3.53157e-31	952.495	-1.23636	0.114666	4.47572e-28	2.3078e-25
Bm325152	844.592	-5.61742	0.533422	3.68818e-27	3.93042e-25	2437.4	-1.02456	0.281409	3.11718e-05	0.000929454
Bm007668	51.0539	-1.59833	0.546706	0.000890025	0.00499364	117.057	-1.00938	0.313315	0.000144245	0.00322104
Bm121247	482.658	-5.66317	0.511828	1.25674e-29	1.57364e-27	1580.06	-1.3169	0.250306	1.27829e-08	9.58194e-07
Bm155476	287.535	-3.1685	0.311202	2.53428e-25	2.40976e-23	841.169	-1.23535	0.289528	1.82196e-06	8.07342e-05
Bm040244	45.4032	-2.31535	0.500419	5.64035e-07	7.35728e-06	144.665	-1.55382	0.261806	2.32514e-10	2.37383e-08
Bm276930	23.3087	-3.79146	0.718579	1.644e-08	2.90542e-07	84.4908	-1.53816	0.360093	1.40356e-06	6.43445e-05
Bm314489	12.6771	-7.61582	2.88924	1.89431e-06	2.20039e-05	67.0241	-2.07792	0.455311	2.93683e-07	1.59911e-05
Bm115837	396.056	-2.79702	0.496676	2.01249e-09	4.1662e-08	1848.73	-2.10509	0.409141	1.43738e-08	1.06629e-06
Bm271258	337.037	-1.4087	0.304429	1.30655e-06	1.57512e-05	843.552	-1.38043	0.221047	3.74202e-11	4.30223e-09
Bm303363	9.35976	-7.17224	2.75057	1.42378e-06	1.70032e-05	38.0758	-1.64114	0.364651	5.17315e-07	2.63547e-05
Bm049958	5.28054	-3.94819	1.63681	0.000954075	0.00529945	21.7126	-1.53266	0.567792	0.000424396	0.00741743
Bm057901	85.6319	-1.15043	0.374465	0.000960346	0.00533003	183.32	-1.09541	0.295864	2.24419e-05	0.000711107
Bm001533	339.575	-3.46202	0.243449	7.35754e-47	2.01555e-44	1153.9	-1.55949	0.188631	1.09973e-17	2.67962e-15
Bm125245	24.3163	-1.49236	0.478627	0.000554946	0.00333621	64.8251	-1.30056	0.416676	0.000137299	0.00309504
Bm045580	36.0727	-2.1056	0.461103	9.15969e-07	1.14253e-05	97.0338	-1.285	0.226742	1.43015e-09	1.27631e-07
Bm327779	8.14254	-6.89311	2.7394	4.15935e-06	4.4621e-05	31.7205	-1.52583	0.399561	1.01443e-05	0.000360359
Bm151544	54.4373	-7.21949	1.00863	2.75742e-12	8.83309e-11	196.864	-1.49424	0.245489	9.2982e-11	1.00454e-08
Bm126582	21.2048	-1.93496	0.592457	0.00021566	0.00147359	61.3147	-1.42288	0.272347	1.54731e-08	1.13894e-06
Bm185760	143.271	-6.00869	0.485756	1.41017e-35	2.35276e-33	517.223	-1.49889	0.261119	7.43054e-10	7.0177e-08
Bm324253	75.8004	-3.85289	0.577761	1.98582e-12	6.47261e-11	279.006	-1.62169	0.282106	6.56142e-10	6.26643e-08
Bm136381	10.3483	-2.77166	0.869796	0.000195822	0.00135476	36.3294	-1.5142	0.408884	1.57044e-05	0.00052465
Bm023781	1515.42	-9.58655	1.19925	8.20279e-17	4.32062e-15	5209.25	-1.40459	0.212505	3.24103e-12	4.4443e-10
Bm063370	439.195	-1.92618	0.140502	2.01616e-43	4.72528e-41	1019.74	-1.11765	0.0854991	5.90433e-40	5.4306e-37
Bm099303	368.162	-1.19693	0.180051	1.38076e-11	4.00459e-10	835.593	-1.31791	0.129912	3.43731e-25	1.48071e-22
Bm030077	18.9241	-3.62295	0.743721	1.43419e-07	2.11266e-06	61.2848	-1.21982	0.462386	0.000628272	0.00997866
Bm097123	16.6495	-3.24975	0.963466	6.9627e-05	0.000545761	53.6823	-1.27565	0.418796	0.000181398	0.00386604
Bm315761	57.7377	-4.08092	0.58004	2.31107e-13	8.49825e-12	170.827	-1.19407	0.215022	2.97709e-09	2.50316e-07
Bm172428	9.36562	-7.1515	2.75742	1.86043e-06	2.16424e-05	48.6281	-1.97556	0.529868	1.05568e-05	0.000372422
Bm053580	262.495	-3.15139	0.263956	8.51962e-34	1.30569e-31	761.973	-1.26775	0.208582	1.1804e-10	1.26191e-08
Bm019262	7.78932	-6.34963	3.06752	0.000261284	0.00173862	60.2171	-2.43926	0.823319	0.000117688	0.0027374
Bm330089	42.9885	-5.60136	1.21349	2.58969e-07	3.62173e-06	155.515	-1.31467	0.488415	0.000478896	0.00812166
Bm322056	23.9298	-4.92054	1.05264	4.19968e-07	5.6286e-06	98.2248	-1.72698	0.339845	2.59167e-08	1.81353e-06
Bm204052	5.83382	-6.12408	2.77501	8.02045e-05	0.000617737	22.4327	-1.44177	0.464575	0.000142096	0.00318311
Bm241018	41.4459	-4.33494	0.55374	8.33597e-16	4.0021e-14	120.18	-1.14992	0.195318	4.4907e-10	4.37475e-08
Bm314426	34.8224	-9.56489	2.93888	1.61091e-11	4.62716e-10	154.155	-1.87025	0.262295	7.09035e-14	1.18281e-11
Bm183565	7.57288	-4.738	1.5367	0.000126846	0.000924496	26.3021	-1.2581	0.471627	0.000587535	0.00949562
Bm094900	30.8409	-2.83465	1.0882	0.000704619	0.00408907	127.018	-1.82694	0.384025	1.23084e-07	7.33575e-06
Bm251273	14.2081	-5.83102	1.47294	3.3907e-06	3.71804e-05	61.2791	-1.75442	0.39421	5.58614e-07	2.82333e-05
Bm334467	14.6631	-7.99307	2.82878	8.93676e-08	1.36899e-06	48.5322	-1.1976	0.388579	0.000179464	0.00383471
Bm304603	1496.29	-6.90689	0.239028	2.74861e-184	1.98956e-180	4494.74	-1.16049	0.163383	1.35994e-13	2.20034e-11
Bm012613	31.2861	-2.08964	0.431106	2.43942e-07	3.42711e-06	77.4057	-1.03389	0.334826	0.000216164	0.00442091
Bm010434	69.0898	-2.31366	0.562076	5.57476e-06	5.80258e-05	194.544	-1.21633	0.372264	9.17489e-05	0.00224952
Bm300249	235.55	-2.08442	0.598678	8.09275e-05	0.000622643	609.496	-1.06164	0.372544	0.000422684	0.00739057
Bm007294	48.0437	-6.10504	0.842039	2.28372e-13	8.40756e-12	163.663	-1.34938	0.302477	6.80567e-07	3.35823e-05
Bm115440	4.95066	-5.56047	2.91864	0.000561457	0.00336804	25.0471	-1.84808	0.624046	0.000164628	0.00357902
Bm136341	224.6	-1.81788	0.658641	0.00109631	0.00595384	641.41	-1.44274	0.225909	1.42496e-11	1.77414e-09
Bm212933	10.7806	-2.87307	0.813563	5.9466e-05	0.000475321	36.3456	-1.44948	0.384959	1.29148e-05	0.0004435
Bm043345	18.6447	-3.92863	1.00017	8.93096e-06	8.85441e-05	77.2184	-1.79739	0.318095	1.14886e-09	1.04933e-07
Bm298797	17.7792	-4.37449	1.04341	2.97337e-06	3.30646e-05	99.487	-2.18641	0.541196	2.74686e-06	0.000115883
Bm035720	20.4263	-2.13761	0.629144	0.000114686	0.000845564	67.9596	-1.51582	0.445181	4.3686e-05	0.00123548
Bm220553	179.653	-2.22429	0.522859	3.20535e-06	3.53559e-05	464.883	-1.13135	0.276612	4.43015e-06	0.000175995
Bm300252	1106.47	-7.39411	0.935917	1.51431e-16	7.80157e-15	3926.62	-1.45343	0.254028	8.56246e-10	8.0421e-08
Bm325537	57.6305	-6.09227	0.72478	3.07652e-17	1.68216e-15	185.826	-1.26748	0.256121	6.97468e-08	4.36587e-06
Bm207494	92.8303	-4.4931	0.944867	1.29294e-07	1.92052e-06	260.377	-1.02897	0.238322	1.91564e-06	8.43359e-05
Bm026559	163.833	-4.53414	0.340227	1.98438e-41	4.2535e-39	492.2	-1.22395	0.185658	4.47735e-12	5.98313e-10
Bm036367	691.726	-3.52315	0.395438	4.51622e-20	3.08511e-18	1895.58	-1.05754	0.266478	8.12952e-06	0.000297696
Bm276032	378.977	-5.34681	1.28036	1.23031e-06	1.49132e-05	1051.69	-1.00978	0.165826	1.51489e-10	1.59116e-08
Bm133937	82.178	-7.29154	0.91846	2.52392e-15	1.15319e-13	342.292	-1.76072	0.272426	7.14971e-12	9.275e-10
Bm106305	63.6093	-2.53153	0.484423	2.377e-08	4.06792e-07	176.472	-1.25519	0.221581	1.43766e-09	1.28189e-07
Bm052837	120.15	-7.87756	0.857617	1.48355e-19	9.76572e-18	389.1	-1.27717	0.224384	1.19469e-09	1.08226e-07
Bm059497	87.0636	-2.29686	0.36106	3.31882e-11	9.15564e-10	243.064	-1.30802	0.266487	8.2653e-08	5.09256e-06
Bm149035	14.1271	-7.92388	2.82386	1.19588e-07	1.78707e-06	47.0654	-1.22441	0.372562	8.90278e-05	0.00219758
Bm322483	489.622	-5.14017	0.330633	1.35883e-55	5.22966e-53	1750.89	-1.53167	0.226529	1.08442e-12	1.58388e-10
Bm028745	94.7638	-4.76753	0.766359	3.93094e-11	1.07217e-09	290.099	-1.21634	0.225637	7.05064e-09	5.55423e-07
Bm119602	216.359	-5.00013	0.462451	1.99672e-28	2.33549e-26	747.072	-1.43485	0.269835	8.50046e-09	6.57958e-07
Bm220000	78.5908	-8.56685	1.36695	1.8778e-12	6.13543e-11	259.196	-1.25824	0.317223	6.41936e-06	0.000243635
Bm119600	489.231	-3.7383	0.254221	5.63965e-50	1.72301e-47	1711.96	-1.52552	0.307221	5.13694e-08	3.32985e-06
Bm084465	166.117	-3.06922	1.36803	0.00129437	0.00685229	458.712	-1.07425	0.221753	1.47965e-07	8.64209e-06
Bm176642	72.2388	-7.0864	0.926323	1.81563e-14	7.56139e-13	223.164	-1.15602	0.278037	3.24722e-06	0.000134601
Bm104108	14.9797	-4.90275	1.36751	4.22859e-05	0.000351463	126.28	-2.83326	0.599186	1.07023e-07	6.45389e-06
Bm104588	9.57811	-7.18385	2.77307	1.9626e-06	2.27005e-05	40.1902	-1.69847	0.374854	4.27118e-07	2.22181e-05
Bm208359	32.1037	-9.43648	2.90914	1.56534e-11	4.50383e-10	129.499	-1.67164	0.297179	1.33273e-09	1.19459e-07
Bm131783	7.95091	-4.8476	1.50785	8.03278e-05	0.000618535	30.5439	-1.49298	0.452428	6.82982e-05	0.00177471
Bm106764	44.0881	-5.6119	0.897397	7.39956e-11	1.93442e-09	218.094	-1.9231	0.53189	1.5697e-05	0.00052465
Bm117894	15.7724	-8.08746	2.86948	1.35238e-07	2.00218e-06	66.5065	-1.62658	0.475779	3.8569e-05	0.00111202
Bm047463	10.5018	-4.00161	1.65681	0.00111141	0.00602428	81.8733	-2.63311	0.717269	1.0453e-05	0.000369142
Bm087962	128.258	-4.21044	0.574664	1.61248e-14	6.75721e-13	352.675	-1.06873	0.143239	1.08834e-14	1.94593e-12
Bm276470	19.3743	-4.38117	0.803787	1.11653e-08	2.03161e-07	56.3924	-1.01944	0.358567	0.000473177	0.00804071
Bm299592	1387.35	-2.91542	0.222113	2.76342e-40	5.69008e-38	3492.71	-1.04279	0.136363	2.69917e-15	5.11259e-13
Bm296082	9.7428	-7.25626	2.74967	9.30989e-07	1.15896e-05	55.5351	-2.2098	0.461048	9.50828e-08	5.79891e-06
Bm149009	70.1397	-3.0475	0.492018	6.57615e-11	1.72998e-09	239.184	-1.50432	0.351949	1.37114e-06	6.31132e-05
Bm137013	142.612	-2.55771	0.224839	8.78049e-31	1.16208e-28	398.892	-1.31401	0.170409	1.21096e-15	2.35042e-13
Bm053746	34.3297	-9.48289	2.98529	3.01918e-10	7.18611e-09	175.874	-2.0154	0.466617	8.68151e-07	4.17883e-05
Bm320276	160.241	-4.94262	0.322124	1.07016e-53	3.77867e-51	453.78	-1.0969	0.132589	1.60606e-17	3.84905e-15
Bm278659	5.97432	-4.2881	1.57769	0.000432582	0.00268455	25.0651	-1.62107	0.508478	9.22377e-05	0.0022593
Bm075533	2377.88	-4.85194	0.27641	3.9153e-70	2.43992e-67	6704.13	-1.08288	0.169199	1.99641e-11	2.42645e-09
Bm268433	145.879	-5.45365	1.50796	1.11161e-05	0.000107698	415.257	-1.0514	0.178455	4.74529e-10	4.59645e-08
Bm136170	6.01405	-6.00981	2.90409	0.000231564	0.00156706	37.8511	-2.36687	0.499268	1.27597e-07	7.59142e-06
Bm199721	531.723	-6.15135	0.34024	4.29134e-74	2.91562e-71	1516.47	-1.06075	0.166068	2.08383e-11	2.52368e-09
Bm199724	115.295	-6.20743	1.16446	5.97065e-09	1.13974e-07	352.024	-1.15929	0.24028	1.45811e-07	8.53088e-06
Bm199726	53.0493	-10.2857	3.00626	2.28587e-13	8.41381e-12	568.948	-3.37592	0.26161	2.43625e-39	2.14419e-36
Bm310455	21.6812	-1.98499	0.495213	1.31092e-05	0.000124792	52.2534	-1.02934	0.285533	3.71711e-05	0.00107811
Bm245786	21.0193	-8.66889	2.86538	2.46976e-09	5.03692e-08	97.2207	-1.8878	0.372784	2.63884e-08	1.83897e-06
Bm222223	58.1827	-10.4015	3.05944	1.60471e-12	5.29368e-11	197.576	-1.20469	0.425512	0.000365173	0.00663262
Bm220041	14.4434	-3.61356	0.848248	3.00499e-06	3.33689e-05	57.7596	-1.64421	0.462981	2.38811e-05	0.00075019
Bm014516	107.299	-7.33052	0.740455	1.18252e-22	9.57197e-21	310.594	-1.07787	0.161983	3.52295e-12	4.78925e-10
Bm324606	47.5493	-10.0976	2.99331	9.07161e-13	3.09344e-11	179.755	-1.50541	0.344466	9.08001e-07	4.35423e-05
Bm099987	48.6974	-7.80011	1.41383	4.30832e-10	1.00064e-08	151.603	-1.08104	0.381044	0.000430032	0.00748316
Bm150000	11.4548	-7.43436	2.85771	2.61338e-06	2.94371e-05	44.4789	-1.40046	0.527501	0.000501649	0.00841527
Bm260524	20.7373	-8.67742	2.83684	7.65219e-10	1.7043e-08	75.4807	-1.39318	0.387669	2.42843e-05	0.000759118
Bm262709	50.4919	-7.915	1.34552	3.70556e-11	1.01452e-09	147.508	-1.04528	0.247933	2.93986e-06	0.000122908
Bm336268	8.50609	-6.97062	2.75005	3.5034e-06	3.82579e-05	29.7733	-1.26142	0.446417	0.000373024	0.0067333
Bm153144	100.921	-1.70626	0.348118	2.48323e-07	3.48346e-06	239.941	-1.1279	0.272316	3.58467e-06	0.000146624
Bm210262	7.08277	-6.57265	2.75673	1.74582e-05	0.000160674	28.56	-1.53414	0.465404	6.71084e-05	0.0017478
Bm243182	125.507	-2.3525	0.398905	5.42273e-10	1.23763e-08	322.633	-1.17779	0.149877	4.39051e-16	9.019e-14
Bm153141	142.748	-1.5774	0.430538	6.9182e-05	0.000542794	393.467	-1.48046	0.248002	1.92907e-10	1.98936e-08
Bm082664	50.5343	-2.44614	0.526122	4.7604e-07	6.30252e-06	125.451	-1.03059	0.214409	1.94871e-07	1.10529e-05
Bm190563	85.8291	-1.86504	0.266871	6.56847e-13	2.28457e-11	234.359	-1.43128	0.172928	1.14564e-17	2.77821e-15
Bm067035	40.2181	-5.25893	0.74904	5.13609e-13	1.80945e-11	165.965	-1.76849	0.280326	1.96703e-11	2.39644e-09
Bm211103	414.935	-9.02026	0.674835	6.64964e-40	1.34276e-37	1223.84	-1.10724	0.170979	1.07962e-11	1.36078e-09
Bm271682	941.38	-1.61883	0.493726	0.000267459	0.0017742	2156.16	-1.05026	0.262096	7.00341e-06	0.000262386
Bm269319	3508.71	-4.22977	0.251534	1.58863e-64	8.28195e-62	9490.72	-1.03216	0.155606	4.25993e-12	5.72255e-10
Bm249701	141.427	-1.51337	0.246195	2.58862e-10	6.23386e-09	348.461	-1.30591	0.231215	1.50284e-09	1.33405e-07
Bm267131	158.454	-6.37731	0.499122	1.11555e-37	2.05427e-35	469.216	-1.08862	0.2508	1.57812e-06	7.11961e-05
Bm236884	10.4532	-7.31842	2.81227	2.03386e-06	2.34196e-05	48.2053	-1.84161	0.431873	1.27966e-06	5.93576e-05
Bm144684	130.677	-3.2996	0.317811	3.40011e-26	3.44031e-24	377.935	-1.26022	0.165467	2.64304e-15	5.02492e-13
Bm144208	1176.57	-4.8545	0.467748	1.98141e-26	2.03658e-24	3339.14	-1.061	0.217368	1.25365e-07	7.46736e-06
Bm059439	55.2559	-5.35327	0.683076	1.04822e-15	4.97539e-14	178.831	-1.29443	0.253858	3.14683e-08	2.15909e-06
Bm119674	40.9926	-1.88496	0.543291	0.000104334	0.000777919	130.654	-1.48262	0.481413	0.000130762	0.00297925
Bm037251	32.9142	-3.85354	0.562551	1.12431e-12	3.792e-11	238.07	-2.81586	0.302659	7.58663e-22	2.64351e-19
Bm176226	376.434	-8.61515	0.625825	1.11415e-42	2.54469e-40	1646.35	-1.87464	0.200323	5.66978e-22	1.98918e-19
Bm004328	26.2171	-5.84361	1.31981	1.51223e-06	1.79457e-05	117.116	-1.74249	0.509339	3.51307e-05	0.00102534
Bm087910	16.9949	-6.18954	1.36687	2.08083e-07	2.96697e-06	58.8868	-1.25196	0.451739	0.000419286	0.00734121
Bm305035	127.773	-2.61007	0.311131	7.22371e-18	4.18821e-16	448.674	-1.67239	0.319792	1.17568e-08	8.8583e-07
Bm084885	98.3032	-4.30621	0.44439	3.59578e-23	3.00632e-21	270.729	-1.0324	0.218828	2.96859e-07	1.61296e-05
Bm201348	5.69139	-5.59639	3.12363	0.000973747	0.00538995	39.2061	-2.24142	0.82882	0.000270008	0.00527078
Bm092014	19.8447	-8.59707	2.83087	1.22471e-09	2.62816e-08	66.7188	-1.31919	0.279018	2.09383e-07	1.17455e-05
Bm293404	1593.39	-3.86824	0.360868	6.94188e-28	7.83246e-26	4970.62	-1.31833	0.247581	9.19626e-09	7.05397e-07
Bm087904	52.292	-10.2716	3.00034	1.48346e-13	5.57814e-12	236.562	-1.72352	0.512431	4.27638e-05	0.00121276
Bm145955	311.656	-2.12974	0.23913	1.01178e-19	6.73798e-18	767.833	-1.02559	0.337981	0.000254104	0.00502372
Bm247595	10.3981	-7.35193	2.78006	1.01538e-06	1.2526e-05	36.4041	-1.24399	0.453001	0.000465693	0.00795458
Bm080035	86.8143	-6.02971	0.661009	1.92909e-20	1.35165e-18	360.001	-1.73949	0.322417	4.61719e-09	3.7205e-07
Bm140296	18.1214	-3.06076	0.714111	2.25875e-06	2.57883e-05	56.5537	-1.35524	0.288039	2.30037e-07	1.28266e-05
Bm239944	12.6763	-7.44918	3.01427	1.52234e-05	0.000142419	253.744	-4.20274	0.602055	1.37624e-13	2.21969e-11
Bm101967	11.7445	-3.06697	0.988669	0.000193451	0.00134072	33.5963	-1.0563	0.386117	0.000626303	0.00996289
Bm260530	52.6009	-5.48208	0.674711	1.53621e-16	7.91226e-15	188.947	-1.50569	0.245072	6.48591e-11	7.15089e-09
Bm327278	18.0061	-8.42083	2.81744	3.24407e-09	6.48603e-08	64.2295	-1.43333	0.282685	3.45638e-08	2.34366e-06
Bm189998	5.14036	-5.69992	2.87818	0.000373774	0.00236665	24.1212	-1.68002	0.642685	0.000476182	0.00808292
Bm002155	11.0144	-6.22723	3.82156	0.00154813	0.00797761	160.242	-3.08203	1.36169	0.000537661	0.00887214
Bm288817	42.4105	-3.85065	0.580536	4.33756e-12	1.35355e-10	135.203	-1.37773	0.192088	7.02916e-14	1.17453e-11
Bm044308	415.64	-4.00724	0.342628	1.14779e-32	1.67063e-30	1475.91	-1.56504	0.249884	2.93116e-11	3.45958e-09
Bm063063	11.9528	-2.1479	0.726281	0.000509147	0.00309692	36.845	-1.3036	0.491806	0.000565288	0.00921925
Bm275987	29.2647	-6.09505	1.2269	1.6833e-07	2.44572e-06	220.402	-2.65139	0.569861	1.53799e-07	8.9572e-06
Bm044781	26.3588	-6.05389	1.09449	2.14082e-08	3.69939e-07	144.634	-2.2677	0.294374	8.37683e-16	1.6542e-13
Bm243916	769.172	-5.92981	0.647699	3.21136e-21	2.36176e-19	2398.13	-1.21367	0.238384	3.5088e-08	2.3709e-06
Bm227436	16.055	-1.94673	0.662112	0.000627011	0.00370123	44.4455	-1.27646	0.323686	7.38534e-06	0.000273689
Bm034973	6.5523	-6.33515	2.80508	5.71084e-05	0.00045858	48.0861	-2.53806	0.627377	2.54833e-06	0.00010863
Bm017180	14.7029	-8.05274	2.78655	1.90525e-08	3.32282e-07	63.379	-1.79174	0.305657	3.35748e-10	3.32149e-08
Bm138832	88.633	-2.31785	0.500724	5.51239e-07	7.20685e-06	223.609	-1.04504	0.290092	3.50337e-05	0.00102299
Bm264829	49.6972	-1.99241	0.359716	6.59632e-09	1.24967e-07	130.837	-1.2831	0.22523	1.18215e-09	1.07317e-07
Bm052385	60.4618	-8.18344	1.34523	7.8034e-12	2.34862e-10	176.484	-1.03745	0.248008	3.42112e-06	0.000140837
Bm056329	49.4997	-6.52006	0.889013	1.90306e-13	7.05722e-12	225.266	-1.88749	0.346275	3.16348e-09	2.64515e-07
Bm022980	18.9601	-4.06092	0.814024	9.50671e-08	1.44754e-06	69.1844	-1.44527	0.443368	7.56653e-05	0.00193124
Bm093755	32.9075	-7.24576	1.34635	1.19611e-09	2.57029e-08	108.3	-1.30832	0.239998	4.72639e-09	3.80249e-07
Bm265734	46.3046	-4.24802	0.634739	2.54704e-12	8.18285e-11	165.874	-1.48126	0.349983	1.69988e-06	7.59841e-05
Bm279062	5.47165	-5.91418	2.82418	0.000184677	0.00128607	28.3536	-1.90159	0.608164	9.40784e-05	0.00229671
Bm009978	27.3245	-2.18757	0.482084	1.00764e-06	1.24434e-05	69.9331	-1.03493	0.377601	0.000616468	0.00985402
Bm113568	3.88588	-5.04711	2.89478	0.00115617	0.00622577	35.4061	-2.7252	0.843172	5.03112e-05	0.00138412
Bm111387	22.8392	-1.39641	0.454851	0.000735554	0.00424243	58.2955	-1.30558	0.344079	1.25389e-05	0.000432628
Bm248397	11.7525	-7.52166	2.8414	1.32794e-06	1.59808e-05	46.632	-1.5395	0.432501	2.51811e-05	0.000781173
Bm265729	56.2723	-6.73917	0.865859	1.11037e-14	4.75042e-13	172.297	-1.16641	0.234415	6.86083e-08	4.30516e-06
Bm068328	252.157	-1.87399	0.282088	7.08963e-12	2.14442e-10	645.371	-1.26333	0.22904	3.3117e-09	2.75365e-07
Bm331461	32.5426	-7.23371	1.33769	1.03188e-09	2.24558e-08	166.059	-2.13916	0.262442	2.40226e-17	5.69041e-15
Bm183842	17.3969	-8.32047	2.84167	1.52592e-08	2.71306e-07	102.685	-2.33109	0.368857	1.54245e-11	1.89957e-09
Bm099049	627.678	-3.84713	0.375672	1.11418e-25	1.08872e-23	1820.86	-1.05317	0.380329	0.00054033	0.00890343
Bm237272	93.6713	-3.61383	0.713927	3.22276e-08	5.39081e-07	399.636	-1.73171	0.541089	7.34606e-05	0.00188345
Bm237270	10.029	-4.35403	1.33755	0.00018333	0.0012781	52.5318	-2.11588	0.455507	2.01054e-07	1.13405e-05
Bm028266	570.417	-2.78943	0.228263	2.95036e-35	4.83671e-33	1451.92	-1.07806	0.158204	1.16992e-12	1.70388e-10
Bm090265	21.509	-2.98061	0.652282	6.03923e-07	7.82779e-06	98.3513	-2.04592	0.386969	7.43736e-09	5.82293e-07
Bm282255	17.3508	-2.17796	0.858807	0.00149896	0.00777124	50.9667	-1.2882	0.370001	4.18238e-05	0.00119073
Bm142070	2068.2	-7.3719	0.587045	1.80718e-37	3.2829e-35	5879.86	-1.06437	0.105078	5.33086e-25	2.25829e-22
Bm005155	169.068	-4.15436	0.456619	7.99868e-21	5.75437e-19	508.805	-1.21054	0.252949	1.66871e-07	9.63607e-06
Bm109035	147.025	-3.96558	0.980261	3.12348e-06	3.45481e-05	1754.66	-3.14358	1.00693	5.68431e-05	0.0015284
Bm305428	65.1932	-5.00765	0.617555	6.95993e-17	3.68661e-15	262.136	-1.70756	0.32299	8.53104e-09	6.59324e-07
Bm102408	26.3658	-9.05798	2.91093	5.66416e-10	1.28838e-08	89.1856	-1.29433	0.332686	8.55787e-06	0.000310817
Bm032739	121.802	-2.49995	0.571544	1.54659e-06	1.83187e-05	334.031	-1.16904	0.306385	1.3002e-05	0.000445821
Bm146058	205.061	-2.72189	0.327268	1.21531e-17	6.89746e-16	696.511	-1.64995	0.204443	5.37392e-17	1.22193e-14
Bm151405	122.32	-2.95826	0.575512	2.8435e-08	4.8051e-07	461.137	-1.68612	0.39864	1.49037e-06	6.77762e-05
Bm230677	124.061	-4.24715	1.03549	2.27354e-06	2.59304e-05	393.66	-1.31272	0.222795	3.52619e-10	3.47493e-08
Bm024306	9.82784	-4.38576	1.24806	9.06085e-05	0.000687376	70.5804	-2.5634	0.611663	1.34093e-06	6.189e-05
Bm101131	62.5838	-2.1732	0.454434	2.84901e-07	3.95385e-06	193.996	-1.58071	0.168951	7.01153e-22	2.45149e-19
Bm316524	241.971	-4.88552	0.620496	2.11237e-16	1.07098e-14	687.351	-1.10771	0.12631	2.1872e-19	6.22005e-17
Bm219863	86.7065	-1.66091	0.418061	1.84156e-05	0.000168505	214.822	-1.22207	0.262601	3.13143e-07	1.69333e-05
Bm266610	149.572	-1.12915	0.264225	9.26512e-06	9.14841e-05	366.502	-1.48314	0.157115	3.30303e-22	1.17909e-19
Bm219865	4.58572	-5.47	2.86032	0.00052753	0.00319292	27.3477	-2.16268	0.614228	2.29371e-05	0.000724325
Bm083091	7.63294	-6.6124	2.84209	3.56104e-05	0.000301776	31.5012	-1.54301	0.518205	0.000182347	0.00387948
Bm227484	26.4991	-9.10596	2.87724	8.66235e-11	2.24428e-09	105.762	-1.6736	0.258261	7.14431e-12	9.275e-10
Bm287580	37.7812	-2.96448	1.09762	0.000522232	0.0031651	176.21	-2.03287	0.407564	3.58289e-08	2.41447e-06
Bm102444	53.161	-5.1311	0.658081	1.32388e-15	6.23194e-14	172.864	-1.18098	0.418184	0.000386043	0.00690361
Bm184315	211.614	-2.99017	0.469348	1.99387e-11	5.66835e-10	580.335	-1.19136	0.142157	5.78254e-18	1.44697e-15
Bm169166	277.438	-4.33489	0.306787	2.75016e-46	7.41514e-44	878.664	-1.32973	0.214284	5.00233e-11	5.61217e-09
Bm217227	65.2154	-4.13532	0.501591	1.99766e-17	1.10837e-15	242.51	-1.56426	0.368083	1.47986e-06	6.73883e-05
Bm151891	102.415	-5.6365	0.811775	3.63099e-13	1.30659e-11	423.881	-1.68988	0.394838	1.19454e-06	5.57383e-05
Bm063013	94.8531	-3.82927	0.830033	2.85237e-07	3.95821e-06	312.172	-1.414	0.227576	4.47902e-11	5.07526e-09
Bm233743	181.116	-12.3465	3.20242	3.64984e-20	2.50967e-18	1672.87	-3.17385	0.0898561	1.97101e-274	5.03072e-270
Bm284014	78.0331	-10.9599	3.05762	5.52272e-16	2.70952e-14	400.964	-2.14632	0.242546	5.60112e-20	1.66233e-17
Bm287523	367.293	-1.44731	0.455384	0.000460829	0.0028372	881.523	-1.26271	0.191398	4.14713e-12	5.59309e-10
Bm034541	12.4586	-3.3823	1.0789	0.000154949	0.00110213	53.3115	-1.7672	0.490132	1.83244e-05	0.000599004
Bm273361	33.5752	-2.33896	0.602585	1.45882e-05	0.000137219	83.7588	-1.02337	0.264305	1.30042e-05	0.000445821
Bm136214	221.323	-3.07865	0.347307	8.83287e-20	5.90319e-18	626.793	-1.23594	0.193009	1.53963e-11	1.8984e-09
Bm326768	379.289	-6.1236	0.464244	6.91851e-41	1.46299e-38	1375.15	-1.44565	0.361039	4.54807e-06	0.000179903
Bm288878	1543.55	-13.0276	1.36117	2.7562e-27	2.97257e-25	5140.09	-1.32911	0.232172	9.33968e-10	8.70005e-08
Bm222620	18.7202	-3.28226	0.68299	2.01212e-07	2.87728e-06	56.9385	-1.19352	0.39099	0.000194485	0.00406684
Bm170109	11.8396	-7.63402	2.7695	1.82185e-07	2.62957e-06	40.2591	-1.25641	0.376666	7.29396e-05	0.00187386
Bm326756	29.2157	-3.09215	1.04533	0.000240116	0.00161634	104.812	-1.61295	0.259257	3.85934e-11	4.42121e-09
Bm194558	5.1476	-5.7657	2.8326	0.000265307	0.00176203	20.6344	-1.48056	0.517239	0.000286031	0.00550048
Bm087015	24.9693	-2.6015	0.613548	3.09237e-06	3.42261e-05	88.9772	-1.62544	0.381952	1.40492e-06	6.43778e-05
Bm023878	86.8179	-1.34037	0.299325	2.90535e-06	3.23867e-05	180.268	-1.02219	0.195542	2.23402e-08	1.5894e-06
Bm280925	258.971	-2.95344	0.393297	6.60552e-15	2.88971e-13	705.316	-1.17153	0.188448	5.49028e-11	6.11926e-09
Bm011896	8.80566	-6.92462	2.83385	1.24454e-05	0.000119197	60.0411	-2.40698	0.627083	6.02037e-06	0.000230895
Bm196156	5.44383	-3.32208	1.28202	0.00152464	0.00787637	27.7073	-2.01203	0.579633	2.89441e-05	0.00087349
Bm229166	8.49608	-6.98326	2.73922	2.81177e-06	3.14403e-05	50.6994	-2.33814	0.388728	1.16771e-10	1.24965e-08
Bm131635	47.6485	-2.58158	0.693658	2.31508e-05	0.000206188	135.993	-1.15841	0.388261	0.000248173	0.00493077
Bm223858	459.107	-1.56663	0.216425	1.41461e-13	5.32668e-12	993.299	-1.06089	0.153033	5.34076e-13	8.12607e-11
Bm096546	251.133	-2.97693	0.196236	7.47561e-53	2.52133e-50	687.436	-1.16054	0.229678	4.55901e-08	2.98555e-06
Bm142777	4.93426	-5.67778	2.8294	0.000312635	0.00203148	19.6458	-1.42094	0.547609	0.000625914	0.00995825
Bm049311	6.01544	-5.87872	3.00058	0.000446549	0.00276066	49.9977	-2.6893	0.718832	8.27415e-06	0.000302017
Bm074769	31.4826	-9.41335	2.90337	1.18185e-11	3.46453e-10	94.8342	-1.00936	0.355866	0.000485068	0.00819775
Bm334136	152.796	-7.52825	0.728154	4.81057e-25	4.48857e-23	661.387	-1.84015	0.254565	3.37011e-14	5.81196e-12
Bm254590	31.6691	-3.56145	0.590334	2.10487e-10	5.14728e-09	193.442	-2.54449	0.323757	2.21939e-16	4.74029e-14
Bm165429	5.66221	-6.03269	2.79342	0.00011553	0.000850716	46.2586	-2.8371	0.466222	7.32631e-11	8.02545e-09
Bm117312	56.0763	-1.23664	0.351021	0.000176961	0.00123866	152.436	-1.48464	0.39573	1.22634e-05	0.000424429
Bm086734	9.38926	-7.18345	2.74661	1.25738e-06	1.5212e-05	81.4247	-2.89425	0.536194	3.44229e-09	2.85026e-07
Bm107517	76.5086	-1.43625	0.302494	7.08107e-07	9.03124e-06	166.028	-1.0874	0.182236	2.93961e-10	2.94232e-08
Bm258941	14.8138	-3.45844	1.02702	6.96647e-05	0.000545989	61.7021	-1.72735	0.470053	1.44456e-05	0.000488184
Bm201618	347.653	-6.11139	1.65194	6.2069e-06	6.39512e-05	1101.28	-1.26298	0.185392	9.51412e-13	1.40773e-10
Bm255438	9.86291	-4.44492	1.16082	3.5001e-05	0.000297187	37.8538	-1.45209	0.516977	0.000316816	0.00594469
Bm129346	13.3443	-3.67859	0.911161	6.9448e-06	7.07138e-05	72.374	-2.2297	0.456714	5.90855e-08	3.77253e-06
Bm151257	600.313	-7.12364	0.367814	5.5102e-84	4.80099e-81	1716.92	-1.05757	0.160649	5.84366e-12	7.73804e-10
Bm027516	17.9926	-8.29635	2.91391	1.16264e-07	1.74114e-06	67.1132	-1.33742	0.509537	0.000569544	0.00927385
Bm105791	103.775	-1.76884	0.319773	7.94215e-09	1.48167e-07	238.828	-1.07281	0.222521	1.67099e-07	9.64378e-06
Bm074783	9.07745	-7.01606	2.81636	7.24272e-06	7.34329e-05	49.5984	-2.07928	0.526042	4.17276e-06	0.00016713
Bm044071	7.20125	-6.44798	2.8734	7.10481e-05	0.00055551	43.5425	-2.28108	0.504211	3.48684e-07	1.85893e-05
Bm257607	868.072	-4.61501	0.315863	1.73353e-49	5.22835e-47	2775.17	-1.30153	0.263716	7.18116e-08	4.47864e-06
Bm081090	39.0255	-2.29782	0.735845	0.000238101	0.00160507	112.52	-1.27756	0.320151	5.69666e-06	0.000219885
Bm125395	149.419	-5.25205	0.772091	7.7323e-13	2.66084e-11	417.219	-1.05995	0.102858	9.10324e-26	4.07626e-23
Bm244355	131.979	-3.64065	0.380289	9.1151e-23	7.42942e-21	401.455	-1.32037	0.172605	1.91744e-15	3.67278e-13
Bm044069	14.3277	-7.99344	2.79226	3.40136e-08	5.66339e-07	58.0758	-1.62432	0.380795	1.4016e-06	6.42832e-05
Bm137375	145.374	-3.19872	0.290994	4.2023e-29	5.10237e-27	463.696	-1.43814	0.240417	1.85188e-10	1.91362e-08
Bm049752	608.255	-3.74226	0.1535	3.11448e-132	9.15848e-129	1798.47	-1.26017	0.163355	1.19253e-15	2.31905e-13
Bm112905	68.1927	-3.43761	0.507839	1.39363e-12	4.64129e-11	203.548	-1.22582	0.296071	3.19291e-06	0.000132457
Bm336359	33.2714	-2.55874	0.734072	5.75528e-05	0.000461598	85.5676	-1.04518	0.240025	1.62382e-06	7.3032e-05
Bm094393	540.725	-14.0961	3.40128	2.05207e-24	1.84167e-22	1675.78	-1.1575	0.266025	1.3745e-06	6.32025e-05
Bm194393	36.1872	-9.45984	3.08783	1.07226e-08	1.95673e-07	221.39	-2.20254	0.643699	2.78778e-05	0.000847655
Bm161475	21.9723	-8.78137	2.84299	3.99113e-10	9.30649e-09	66.0939	-1.01341	0.354109	0.000451302	0.00776553
Bm159183	897.45	-8.39171	0.545717	3.52333e-54	1.27762e-51	2785.42	-1.10032	0.339299	0.000114657	0.00267914
Bm100916	35.686	-3.86079	0.835178	3.43443e-07	4.69259e-06	104.162	-1.09481	0.325924	7.91798e-05	0.00200143
Bm232359	10.3461	-3.61619	0.952232	2.3839e-05	0.000211696	43.6598	-1.79082	0.417189	1.16146e-06	5.44437e-05
Bm307159	168.045	-3.89338	0.356432	8.03427e-29	9.60637e-27	468.06	-1.08551	0.226675	1.91135e-07	1.08772e-05
Bm298150	134.217	-2.9773	0.497767	2.25435e-10	5.48714e-09	352.158	-1.05503	0.227268	4.1123e-07	2.14972e-05
Bm312507	4.2358	-5.27612	2.87091	0.000759555	0.00435723	20.142	-1.76535	0.574893	0.000128876	0.00294813
Bm065876	155.895	-2.64998	0.400704	4.98653e-12	1.54301e-10	458.067	-1.38711	0.161737	9.05853e-19	2.40839e-16
Bm175641	59.5569	-1.84373	0.367864	1.26806e-07	1.88624e-06	255.471	-2.05105	0.537997	7.03064e-06	0.000263022
Bm235879	7.91887	-6.48097	2.99664	0.000144154	0.00103466	46.8329	-2.18196	0.585793	1.01145e-05	0.000359677
Bm238958	25.0178	-3.51434	0.608102	1.04019e-09	2.26159e-08	78.3368	-1.21931	0.399788	0.000187536	0.00395897
Bm036086	69.7432	-1.74029	0.60582	0.000875614	0.00492464	247.183	-1.78158	0.414325	1.04247e-06	4.92505e-05
Bm057346	41.8148	-6.72613	1.12439	1.29055e-09	2.75813e-08	233.486	-2.20611	0.425641	1.20752e-08	9.08481e-07
Bm249605	12.7012	-4.82837	1.2194	1.86484e-05	0.000170371	42.1556	-1.21903	0.427309	0.000353197	0.0064634
Bm107127	66.5474	-5.65201	1.18829	9.92024e-08	1.5049e-06	199.782	-1.13742	0.231645	9.84791e-08	5.99173e-06
Bm107118	25.0692	-4.29184	0.782116	6.20886e-09	1.1809e-07	89.5636	-1.51517	0.288848	1.2308e-08	9.24627e-07
Bm082774	56.284	-6.36378	0.767502	1.32816e-16	6.88024e-15	227.828	-1.73982	0.21438	3.58472e-17	8.31769e-15
Bm251922	59.8855	-2.48226	0.471528	2.06295e-08	3.57434e-07	391.769	-2.6439	0.569038	1.60251e-07	9.2853e-06
Bm016458	11.8885	-5.52739	1.48734	1.01185e-05	9.90421e-05	53.5775	-1.70257	0.559195	0.000127289	0.00291704
Bm121452	278.902	-5.88105	0.428655	9.47677e-44	2.25762e-41	1015.84	-1.55622	0.194112	8.65003e-17	1.924e-14
Bm112937	34.3495	-1.95839	0.408391	3.47141e-07	4.73829e-06	88.7097	-1.10172	0.402184	0.000553598	0.00906335
Bm313808	231.125	-1.98646	0.357292	5.41398e-09	1.04183e-07	898.627	-2.0023	0.304978	3.2518e-12	4.4443e-10
Bm211491	15.9969	-8.16272	2.83318	3.4541e-08	5.7446e-07	84.5791	-2.07734	0.454825	2.78656e-07	1.52134e-05
Bm215856	3.69979	-4.827	2.97583	0.00185946	0.00932747	21.7962	-2.21458	0.527395	1.79709e-06	7.984e-05
Bm131268	12.3997	-7.68622	2.80128	2.76074e-07	3.84296e-06	47.8787	-1.42459	0.492384	0.000248609	0.00493707
Bm082315	35.4247	-3.53435	0.634053	2.8969e-09	5.84408e-08	115.247	-1.39093	0.288221	1.16948e-07	7.01099e-06
Bm048032	7.99734	-6.77895	2.80625	1.39309e-05	0.000131695	31.3283	-1.49899	0.447083	5.62313e-05	0.00151675
Bm175288	20.4062	-5.14697	0.946117	1.9824e-08	3.44462e-07	61.0686	-1.09927	0.296233	2.22176e-05	0.000705751
Bm321404	50.9055	-3.35997	0.693207	1.12558e-07	1.69045e-06	177.107	-1.48659	0.370515	4.30329e-06	0.000171751
Bm279466	175.177	-8.42617	0.874521	1.92768e-21	1.44135e-19	832.465	-2.01503	0.24176	5.07882e-18	1.28029e-15
Bm091297	16.966	-5.35728	1.13004	9.52669e-07	1.18274e-05	56.1066	-1.22747	0.391311	0.000143058	0.00320013
Bm014259	67.5325	-10.7213	3.02895	1.97908e-15	9.1581e-14	256.271	-1.53401	0.320716	1.27739e-07	7.59547e-06
Bm327191	73.2247	-3.81719	0.42274	2.2742e-20	1.58578e-18	260.485	-1.47514	0.394215	1.26962e-05	0.000436875
Bm163277	3087.06	-5.4176	0.247835	3.47927e-107	5.84639e-104	8552.33	-1.02452	0.159897	1.97874e-11	2.40783e-09
Bm185067	172.218	-6.06893	0.513448	5.17205e-33	7.63432e-31	550.726	-1.25608	0.255496	8.26134e-08	5.09256e-06
Bm168965	79.0016	-5.46675	0.536579	7.92791e-25	7.31384e-23	302.893	-1.65803	0.208427	1.36355e-16	2.95563e-14
Bm316044	2303.99	-1.9654	0.68244	0.000655473	0.00384405	6508.54	-1.27651	0.380304	6.21122e-05	0.00164027
Bm315196	944.547	-5.23653	0.17608	2.56149e-195	2.09595e-191	3013.49	-1.32307	0.164558	8.60983e-17	1.91924e-14
Bm169821	57.5679	-2.16695	0.481935	1.15542e-06	1.40871e-05	170.497	-1.39142	0.345426	4.38079e-06	0.000174436
Bm163285	250.023	-4.47264	0.401043	5.61231e-30	7.14636e-28	674.745	-1.00204	0.171629	7.07211e-10	6.71022e-08
Bm295941	6.36844	-6.35226	2.7505	3.35787e-05	0.000286455	40.5055	-2.1921	0.71904	0.000102996	0.0024649
Bm189415	195.558	-5.3545	1.68978	4.45737e-05	0.000368152	633.318	-1.28095	0.252618	3.65169e-08	2.45435e-06
Bm299091	12.6739	-4.028	1.39906	0.000336572	0.00216526	98.6221	-2.71861	0.614089	4.47754e-07	2.31107e-05
Bm166761	373.857	-3.93774	0.360212	7.01201e-29	8.4269e-27	1027.77	-1.10208	0.124919	1.37166e-19	3.9897e-17
Bm058254	61.23	-10.5418	3.02435	2.12654e-14	8.78432e-13	207.316	-1.36584	0.221245	5.96394e-11	6.6111e-09
Bm263934	108.385	-4.57885	0.639165	5.74724e-14	2.25903e-12	482.362	-1.81923	0.467021	5.62388e-06	0.000217651
Bm081031	44.4307	-5.19444	0.674746	2.92833e-15	1.32894e-13	216.568	-2.0914	0.258443	3.82175e-17	8.84758e-15
Bm062753	96.8273	-6.87046	0.69644	8.28192e-23	6.76497e-21	274.418	-1.02682	0.184399	3.31946e-09	2.7575e-07
Bm061425	4.44052	-5.24271	2.9722	0.00107251	0.00585026	27.6266	-2.33054	0.522083	5.04074e-07	2.57186e-05
Bm085877	31.3627	-2.71731	0.518964	2.17295e-08	3.75078e-07	110.969	-1.64316	0.337012	7.70142e-08	4.78266e-06
Bm284842	10.0983	-7.26766	2.79652	1.97879e-06	2.28667e-05	37.7535	-1.39456	0.459451	0.000170939	0.00368882
Bm228702	34.4215	-1.56703	0.466644	0.00022462	0.00152639	79.724	-1.00483	0.364502	0.000620071	0.00988994
Bm129385	164.993	-5.23909	0.846132	3.96304e-11	1.07967e-09	756.769	-1.95534	0.302304	6.33104e-12	8.31868e-10
Bm129391	219.23	-5.98016	0.384318	2.43255e-55	9.26726e-53	666.317	-1.22293	0.103431	3.1916e-33	2.1579e-30
Bm026226	19.0649	-3.68657	0.684459	1.20364e-08	2.17769e-07	69.4107	-1.60018	0.283998	1.3797e-09	1.23452e-07
Bm271538	1624.96	-1.7581	0.187724	1.95856e-21	1.46327e-19	3515.66	-1.00627	0.122253	2.56656e-17	6.05151e-15
Bm328006	91.6124	-6.10703	0.656704	3.5672e-21	2.61426e-19	277.304	-1.14084	0.247954	4.43627e-07	2.29261e-05
Bm124544	181.785	-2.04011	0.404098	8.30171e-08	1.28032e-06	439.608	-1.114	0.166604	2.67992e-12	3.70236e-10
Bm201156	5.12312	-5.66733	2.8967	0.000429164	0.00266615	24.2019	-1.81018	0.519669	3.13795e-05	0.000934557
Bm032441	52.7023	-3.06526	1.14939	0.000511333	0.00310842	166.007	-1.34485	0.263487	2.9128e-08	2.0134e-06
Bm081853	113.714	-4.8	0.423155	8.86253e-31	1.17211e-28	430.781	-1.68555	0.166222	4.07364e-25	1.74014e-22
Bm081850	13.9377	-2.69185	0.997327	0.000699272	0.00406173	61.4206	-2.02113	0.312402	6.95221e-12	9.0533e-10
Bm081852	38.0423	-3.64759	0.611796	2.85691e-10	6.82146e-09	115.764	-1.17713	0.363676	0.000107174	0.0025387
Bm147651	681.743	-6.58914	0.325909	1.10159e-91	1.24142e-88	3015.4	-1.92561	0.15772	1.94225e-35	1.44739e-32
Bm007466	14.4019	-7.66074	3.04781	1.14811e-05	0.000110784	103.726	-2.47328	0.67724	1.1536e-05	0.000403618
Bm012844	77.6339	-2.32808	0.500311	4.96623e-07	6.54968e-06	262.768	-1.68364	0.237024	9.10659e-14	1.50198e-11
Bm098275	106.785	-6.11468	0.955194	8.41255e-12	2.52429e-10	322.214	-1.11556	0.279841	7.00593e-06	0.000262386
Bm100553	65.1232	-4.01084	0.826083	8.57395e-08	1.31831e-06	304.986	-1.89725	0.499554	7.93258e-06	0.000291425
Bm294166	159.375	-4.11566	0.413049	1.79334e-24	1.61485e-22	679.693	-1.86328	0.332264	1.31094e-09	1.17713e-07
Bm165076	448.7	-5.50357	0.278547	1.41404e-87	1.3933e-84	1260.39	-1.04414	0.16648	4.57425e-11	5.17168e-09
Bm247366	153.029	-5.32306	0.538546	3.59929e-24	3.18918e-22	439.34	-1.04551	0.257382	5.635e-06	0.000217999
Bm123239	138.917	-2.64476	0.410495	1.48892e-11	4.29315e-10	565.693	-1.88309	0.404692	1.94465e-07	1.10421e-05
Bm247360	21.6056	-5.16511	1.0736	3.0712e-07	4.23628e-06	123.712	-2.1068	0.641149	4.68835e-05	0.00130887
Bm065396	12.4848	-3.75693	1.14325	0.000102685	0.000767151	67.3807	-2.09206	0.605646	2.71256e-05	0.000830642
Bm297661	179.841	-1.94343	0.419029	7.09569e-07	9.04805e-06	441.731	-1.14805	0.222766	2.75896e-08	1.91354e-06
Bm237572	551.464	-2.62101	0.421475	6.3357e-11	1.67069e-09	1399.67	-1.05089	0.223707	3.14324e-07	1.69881e-05
Bm250539	175.855	-1.89569	0.312563	2.87427e-10	6.86117e-09	395.325	-1.0181	0.161987	4.39482e-11	4.98539e-09
Bm332414	178.299	-4.15722	0.297288	2.6349e-45	6.77439e-43	716.009	-1.7629	0.298649	2.42355e-10	2.46444e-08
Bm029256	37.0028	-4.31701	0.937916	2.8064e-07	3.90104e-06	150.001	-1.79996	0.208327	4.28028e-19	1.15913e-16
Bm251867	125.935	-1.36269	0.396027	0.000204469	0.00140626	292.368	-1.23016	0.205674	2.22955e-10	2.28538e-08
Bm020414	6.55453	-6.40515	2.75608	2.9752e-05	0.000257297	35.8796	-2.02464	0.591077	3.20302e-05	0.000951161
Bm148953	19.7565	-4.69409	0.895758	3.58509e-08	5.94144e-07	87.6746	-1.73833	0.52193	4.84387e-05	0.00134383
Bm020413	29.3628	-2.18841	0.874168	0.00155708	0.00801799	128.506	-1.94959	0.524881	1.08917e-05	0.000383571
Bm051158	292.451	-13.1291	3.28732	9.86991e-23	8.02032e-21	2947.8	-3.31057	0.0967932	1.3227e-257	2.7008e-253
Bm084928	461.027	-4.48608	0.389508	9.63033e-32	1.34154e-29	1242.04	-1.00001	0.147095	9.8438e-13	1.45021e-10
Bm324079	60.9803	-5.67178	0.689675	4.31558e-17	2.33119e-15	184.904	-1.12842	0.279867	5.69909e-06	0.000219895
Bm286965	182.952	-2.76586	0.518836	1.10682e-08	2.01551e-07	735.395	-1.89151	0.318074	1.75695e-10	1.82476e-08
Bm134795	48.0794	-4.08175	0.632873	1.09782e-11	3.23685e-10	130.879	-1.00632	0.233143	2.02099e-06	8.844e-05
Bm215340	18.5298	-8.38073	2.89305	4.32022e-08	7.04743e-07	108.735	-2.17091	0.578894	8.6703e-06	0.000314565
Bm072957	26.0839	-3.7218	0.589127	4.05254e-11	1.10071e-09	96.8833	-1.64312	0.293303	1.59462e-09	1.40709e-07
Bm250584	152.392	-3.02632	1.03821	0.00025474	0.00170151	414.236	-1.02175	0.293265	5.64565e-05	0.00152081
Bm019882	199.562	-2.0216	0.251611	1.97044e-16	1.00117e-14	699.178	-1.88385	0.11359	6.66538e-63	1.13416e-59
Bm324050	176.126	-3.42843	0.504821	9.94411e-13	3.37445e-11	508.093	-1.1606	0.281201	3.63509e-06	0.00014833
Bm148961	23.3286	-4.0054	0.681423	6.88212e-10	1.54265e-08	80.1415	-1.43485	0.323858	7.45889e-07	3.65582e-05
Bm043989	60.917	-4.93791	0.741521	2.17428e-12	7.05025e-11	481.249	-2.70878	0.63032	7.80288e-07	3.80615e-05
Bm329730	9.5263	-4.27145	1.28383	0.00014625	0.00104801	82.1336	-2.95495	0.523478	8.58668e-10	8.05743e-08
Bm332466	4.60936	-5.36758	2.94211	0.000823237	0.00466905	29.4133	-2.19384	0.723178	0.000110761	0.00260494
Bm241681	95.4299	-1.90361	0.417497	1.06687e-06	1.30992e-05	259.295	-1.37944	0.19671	2.1321e-13	3.38003e-11
Bm046680	57.3962	-1.94684	0.564907	0.000105908	0.000787973	148.576	-1.2043	0.256509	2.63497e-07	1.44476e-05
Bm287440	129.5	-5.62838	0.524965	9.37708e-28	1.04671e-25	369.605	-1.02287	0.261372	1.08042e-05	0.000380624
Bm126332	7.60068	-6.70275	2.77118	1.30819e-05	0.000124551	29.0554	-1.37306	0.521023	0.000560569	0.00915236
Bm208619	4.26167	-5.27219	2.88254	0.000793021	0.00451917	26.6086	-2.31415	0.540896	1.13424e-06	5.32408e-05
Bm100162	13.97	-7.96189	2.77719	2.72573e-08	4.62186e-07	74.4485	-2.11145	0.422233	3.35528e-08	2.28674e-06
Bm097340	34.2566	-2.56284	0.602927	2.71811e-06	3.05018e-05	90.2104	-1.04688	0.333941	0.000182581	0.00388019
Bm215384	37.121	-3.82771	0.525342	4.54219e-14	1.80803e-12	135.13	-1.60081	0.279437	7.62937e-10	7.17892e-08
Bm328864	2013.64	-2.31677	0.441198	2.2563e-08	3.88147e-07	4877.04	-1.0551	0.140296	6.98534e-15	1.26223e-12
Bm226037	42.6255	-4.11809	0.87927	2.33603e-07	3.29565e-06	151.821	-1.42686	0.413365	3.91403e-05	0.00112626
Bm265636	98.1394	-6.15952	0.736658	7.77488e-18	4.48155e-16	327.356	-1.24049	0.393446	0.000129751	0.00296482
Bm004827	12.996	-3.82628	1.0897	4.51427e-05	0.000372365	47.247	-1.43692	0.458149	0.000117115	0.0027282
Bm032028	123.42	-8.41172	1.05745	5.45559e-15	2.40341e-13	467.711	-1.54641	0.310642	4.71659e-08	3.07887e-06
Bm328855	138.221	-1.79222	0.385986	8.03375e-07	1.01452e-05	524.81	-1.96811	0.37167	7.17282e-09	5.64612e-07
Bm092941	4.80715	-5.43332	2.96261	0.000792734	0.00451836	27.5437	-2.12628	0.573191	1.14981e-05	0.000402704
Bm244752	145.117	-1.80854	0.21599	1.42395e-17	8.02594e-16	331.709	-1.03426	0.25342	5.28365e-06	0.00020644
Bm163718	15.62	-7.9963	2.92418	6.39974e-07	8.23708e-06	71.0703	-1.70623	0.559307	0.000123899	0.00285225
Bm288732	56.7078	-1.94126	0.38543	1.03841e-07	1.56907e-06	135.674	-1.11563	0.180829	8.27943e-11	8.99235e-09
Bm274583	24.7039	-6.81559	1.34214	9.07356e-09	1.67612e-07	81.7678	-1.25939	0.322029	8.14298e-06	0.000297803
Bm144188	30.5929	-1.68316	0.477747	0.00010981	0.000813599	76.4782	-1.15403	0.354184	0.000104326	0.00248915
Bm034650	94.2014	-6.35192	0.628834	2.81066e-24	2.50813e-22	357.541	-1.62852	0.19481	4.87137e-18	1.23409e-15
Bm117876	161.326	-5.69883	0.981969	3.89719e-10	9.10888e-09	639.486	-1.66204	0.302102	2.63794e-09	2.2313e-07
Bm044448	600.941	-5.22617	0.303603	1.08763e-67	6.33716e-65	2222.95	-1.59914	0.209837	1.93209e-15	3.69391e-13
Bm145063	139.113	-1.32407	0.384625	0.000213835	0.00146249	406.076	-1.66617	0.285518	3.83307e-10	3.75921e-08
Bm139610	243.921	-3.82435	0.271697	5.09123e-46	1.35717e-43	696.213	-1.16215	0.194848	2.65858e-10	2.68016e-08
Bm196618	50.4588	-5.89312	0.714498	1.13408e-16	5.90243e-15	156.548	-1.12473	0.339192	8.75198e-05	0.00216822
Bm011525	125.12	-4.10279	0.467287	1.67194e-19	1.0956e-17	343.687	-1.00481	0.269715	2.33089e-05	0.000734772
Bm059904	4.74956	-5.46014	2.9248	0.000676007	0.00394542	43.8516	-2.74655	0.847284	4.7546e-05	0.00132374
Bm076006	214.025	-2.38532	0.238961	2.8977e-24	2.5809e-22	529.264	-1.04188	0.256269	5.57817e-06	0.000216265
Bm098251	25.0448	-5.98833	1.09553	3.30728e-08	5.52139e-07	93.5021	-1.49931	0.348517	1.24949e-06	5.81164e-05
Bm030277	254.07	-12.8951	3.2579	6.35167e-22	4.89307e-20	2267.78	-3.11291	0.119052	5.91683e-152	3.77545e-148
Bm098253	423.808	-7.40594	0.439745	4.24477e-64	2.15326e-61	1538.42	-1.50379	0.240523	3.23408e-11	3.78647e-09
