# Supplementary material for: Variability in Leaf Color Induced by Chlorophyll Deficiency: Transcriptional Changes in Bamboo Leaves
Source: Curr Issues Mol Biol. 2024 Feb 14;46(2):1503–15. doi: 10.3390/cimb46020097 (PMC10888276; doi:10.3390/cimb46020097)
Supplement: Supplementary file 1 [file cimb-46-00097-s001.zip › Table S10.xlsx]

## Sheet: fig4
Gene ID	Biological Process	Sub-Process	Enzyme Activity	Enzyme Name
Bm043989	Protein homeostasis	protein quality control	smallHsp holdase chaperone activities	class-C-II protein
Bm044308	Protein homeostasis	ubiquitin-ligase E3 activities	U-Box E3 ligase activities	group-III ligase
Bm294166	Protein homeostasis	ubiquitin-ligase E3 activities	U-Box E3 ligase activities	group-III ligase
Bm312769	Protein homeostasis	ubiquitin-ligase E3 activities	RING-domain E3 ligase activities	ATL-subclass ligase
Bm244752	Protein homeostasis	ubiquitin-ligase E3 activities	RING-domain E3 ligase activities	ATL-subclass ligase
Bm145063	Protein homeostasis	ubiquitin-ligase E3 activities	RING-domain E3 ligase activities	ATL-subclass ligase
Bm307791	Protein homeostasis	ubiquitin-ligase E3 activities	RING-domain E3 ligase activities	ubiquitin protein ligase (BRH)
Bm265734	Protein homeostasis	ubiquitin-ligase E3 activities	RING-domain E3 ligase activities	E3 ubiquitin ligase (LOG2/LUL)
Bm282903	Protein homeostasis	ubiquitin-proteasome system	ubiquitin-fold protein deconjugation	deubiquitinase (OTU6-12)
Bm063013	Protein homeostasis	ubiquitin-proteasome system	ubiquitin-fold protein deconjugation	deubiquitinase (OTU6-12)
Bm196115	Protein homeostasis	proteolysis	cysteine-type peptidase activities	C1-class protease (Papain)
Bm074281	Protein homeostasis	proteolysis	cysteine-type peptidase activities	C13-class asparaginyl endopeptidase (Legumain)
Bm202712	Protein homeostasis	proteolysis	cysteine-type peptidase activities	C26-class gamma-glutamyl peptidase
Bm297661	Protein homeostasis	proteolysis	cysteine-type peptidase activities	C26-class gamma-glutamyl peptidase
Bm242833	Protein homeostasis	proteolysis	serine-type peptidase activities	proteolytic core component ClpP1/3-6
Bm022381	Protein homeostasis	proteolysis	aspartic-type peptidase activities	A1-class protease (Pepsin)
Bm126582	Protein homeostasis	proteolysis	aspartic-type peptidase activities	A1-class protease (Pepsin)
Bm222262	Photosynthesis	photophosphorylation	photosystem II	protease (FtsH2/8)
Bm081594	Protein homeostasis	proteolysis	protease inhibitor activities	PR6 protease inhibitor
Bm315480	Protein homeostasis	protein storage	vegetative storage protein activities	acid phosphatase storage protein
