# Supplementary material for: Variability in Leaf Color Induced by Chlorophyll Deficiency: Transcriptional Changes in Bamboo Leaves
Source: Curr Issues Mol Biol. 2024 Feb 14;46(2):1503–15. doi: 10.3390/cimb46020097 (PMC10888276; doi:10.3390/cimb46020097)
Supplement: Supplementary file 1 [file cimb-46-00097-s001.zip › Table S11.xlsx]

## Sheet: fig7
Gene ID	Biological Process	Sub-Process	Enzyme Activity	Enzyme Name
Bm315242	Photosynthesis	photorespiration	hydroxypyruvate reductase activities	peroxisomal hydroxypyruvate reductase (HPR1)
Bm315230	Photosynthesis	photorespiration	hydroxypyruvate reductase activities	peroxisomal hydroxypyruvate reductase (HPR1)
Bm014956	Photosynthesis	photorespiration	hydroxypyruvate reductase activities	peroxisomal hydroxypyruvate reductase (HPR1)
Bm013355	Photosynthesis	photorespiration	hydroxypyruvate reductase activities	peroxisomal hydroxypyruvate reductase (HPR1)
Bm013041	Photosynthesis	photorespiration	glycine decarboxylase complex	aminomethyltransferase component T-protein
Bm013038	Photosynthesis	photorespiration	glycine decarboxylase complex	aminomethyltransferase component T-protein
Bm217398	Photosynthesis	photorespiration	glycine decarboxylase complex	aminomethyltransferase component T-protein
Bm149310	Photosynthesis	photorespiration	glycine decarboxylase complex	lipoamide-containing component H-protein
Bm064110	Photosynthesis	photorespiration	glycine decarboxylase complex	lipoamide-containing component H-protein
Bm045141	Photosynthesis	photorespiration	glycine decarboxylase complex	lipoamide-containing component H-protein
Bm010887	Photosynthesis	photorespiration	glycine decarboxylase complex	lipoamide-containing component H-protein
Bm036482	Photosynthesis	photorespiration	glycine decarboxylase complex	lipoamide-containing component H-protein
Bm123407	Photosynthesis	photorespiration	aminotransferase activities	serine-glyoxylate transaminase
Bm164725	Photosynthesis	photorespiration	aminotransferase activities	serine-glyoxylate transaminase
Bm180624	Photosynthesis	photorespiration	aminotransferase activities	serine-glyoxylate transaminase
Bm180625	Photosynthesis	photorespiration	aminotransferase activities	serine-glyoxylate transaminase
